1 **Title**

2 *A Penicillium rubens* platform strain for secondary metabolite production

3 **Authors**

4 Carsten Pohl<sup>1,\*,#</sup>, Fabiola Polli<sup>1,#</sup>, Tabea Schütze<sup>2</sup>, Annarita Viggiano<sup>1</sup>, László Mózsik<sup>1</sup>, Sascha Jung<sup>2</sup>, Maaïke  
5 de Vries<sup>1</sup>, Roel A.L. Bovenberg<sup>3,4</sup>, Vera Meyer<sup>2</sup> and Arnold J.M. Driessen<sup>1</sup>

6 <sup>1</sup> Molecular Microbiology, Groningen Biomolecular Sciences and Biotechnology Institute, University of  
7 Groningen, Groningen, The Netherlands

8 <sup>2</sup> Applied and Molecular Microbiology, Institute of Biotechnology, TU Berlin, Berlin, Germany

9 <sup>3</sup> DSM Biotechnology Centre, Delft, The Netherlands

10 <sup>4</sup> Synthetic Biology and Cell Engineering, Groningen Biomolecular Sciences and Biotechnology Institute,  
11 University of Groningen, Groningen, The Netherlands

12 \* present address: Technische Universität Berlin, Faculty III Process Sciences, Institute of Biotechnology,  
13 Chair of Applied and Molecular Microbiology, Berlin, Germany

14 # contributed equally

15 **Abstract**

16 We present a *Penicillium rubens* strain with an industrial background in which the four highly expressed  
17 biosynthetic gene clusters (BGC) required to produce penicillin, roquefortine, chrysogine and fungisporin  
18 were removed. This resulted in a minimal secondary metabolite background. Amino acid pools under  
19 steady-state growth conditions showed reduced levels of methionine and increased intracellular aromatic  
20 amino acids. Expression profiling of remaining BGC core genes and untargeted mass spectrometry did not  
21 identify products from uncharacterized BGCs. This platform strain was repurposed for expression of the  
22 recently identified polyketide calbistrin gene cluster and achieved high yields of decumbenone A, B and C.  
23 The penicillin BGC could be restored through *in vivo* assembly with eight DNA segments with short

24 overlaps. Our study paves the way for fast combinatorial assembly and expression of biosynthetic  
25 pathways in a fungal strain with low endogenous secondary metabolite burden.

## 26 **Keywords**

27 Platform strain, Natural products, *Penicillium*, Biosynthetic gene clusters, Decumbenone, Calbistrin,  
28 CRISPR/Cas9, RNP

## 29 **Introduction**

30 The fungal kingdom contains a massive reservoir of biosynthetic gene clusters (BGCs) encoding secondary  
31 metabolites, offering the discovery of potential new natural lead compounds for numerous applications  
32 like pharmaceutical drugs or food ingredients. However, successful follow-up of fungal genome mining  
33 studies<sup>1,2</sup> for novel secondary metabolites is often hampered by difficulties in handling promising fungi  
34 and identifying the specific conditions required for BGC activation<sup>3-5</sup>. To overcome these difficulties  
35 inherent to natural producers, a common approach is the transfer of promising BGCs into a more tractable  
36 organism. Although reported to be successful in prokaryotes like actinomycetes<sup>6,7</sup> and eukaryotes such as  
37 baker's yeast<sup>8-10</sup> and filamentous fungi<sup>11,12</sup>, yields of heterologous secondary metabolites can vary  
38 substantially from the natural producer. Moreover, the native BGC-related product fingerprint of the host  
39 organism is mainly left unchanged, which drains cellular resources into unwanted BGC products,  
40 complicates target compound purification and can even lead to unspecific enzymatic conversion of the  
41 target compound if the specificity of native BGC enzymes is low. Thus, we envisioned that a tractable  
42 fungal host with a low background of endogenous secondary metabolites simplifies detection of novel  
43 molecules in broth samples as well as downstream purification.

44 *Penicillium rubens* (former name: *Penicillium chrysogenum*) is an industrially relevant fungal cell factory  
45 primarily used for production of  $\beta$ -lactam-derived antibiotics. With the growing interest in fungal natural  
46 product discovery, precise genetic engineering of filamentous fungi gaining momentum<sup>13</sup> and synthetic  
47 biology tools being frequently utilized to recode BGCs for heterologous hosts<sup>14,15</sup>, we reasoned that the  
48 specialization of *P. rubens* into a penicillin cell factory might be favorable for further advances towards a  
49 platform strain for expression of any novel BGC<sup>16</sup>. Similar approaches have been undertaken in *Aspergillus*  
50 *nidulans*<sup>17</sup> where a strain with low background expression of endogenous BGCs was used for heterologous  
51 expression of BGCs randomly present on a large plasmids<sup>11</sup>. Several decades of classical strain

52 improvement (CSI) have led to accumulation of point mutations<sup>18</sup> that resulted in strains optimized for  
53 high  $\beta$ -lactam yield in large scale fermenters<sup>19</sup> and low unwanted secondary metabolite production. The  
54 superior fermentation characteristics of such strains were successfully employed for the production of  
55 cephalosporins<sup>20</sup> and, after deletion of the penicillin BGC, also for the heterologous polyketide  
56 pravastatin<sup>21</sup>. *P. rubens* research has led to a full genome sequence<sup>22</sup> and a metabolic model<sup>23</sup> which makes  
57 it attractive for future rational strain improvements. In addition, the efficiency of integrating multiple DNA  
58 fragments into *P. rubens* has been increased by utilizing split-marker approaches<sup>24</sup> and the targetable  
59 nuclease Cas9<sup>25</sup>. However, direct *in vivo* recombination for fast construction of different BGC pathway  
60 combinations has not yet been demonstrated. Moreover, since the precursors for the biosynthesis of  
61 penicillins,  $\alpha$ -amino adipic acid, L-cysteine and L-valine originate from diverse anabolic routes, a careful  
62 elucidation of intracellular amino acid pools would be required to assess the impact of CSI on the flexibility  
63 of the metabolism to respond to high and low amino acid demands.

64 Here, we report on the construction of a *P. rubens* strain lacking four highly expressed secondary  
65 metabolite BGCs resulting in a near to complete secondary metabolite deficient metabolome under the  
66 cultivation conditions tested here. We performed genomic and transcriptome analysis, characterized its  
67 amino acid profile and demonstrated its suitability for efficient BGC recombination by reconstructing the  
68 Penicillin BGC (Pen-BGC) of 17kb by *in vivo* recombination with 8 DNA fragment with short (110 bp)  
69 overlapping flanks. Finally, we utilized this new platform strain for expression of the heterologous  
70 calbistrin BGC from *P. decumbens*, yielding decumbenone A, B and C in the culture supernatant. This  
71 study paves the way to utilize *P. rubens* for exploration and production of novel BGCs.

## 72 **Results and Discussion**

### 73 **4 NRPSs display robust expression during low growth rates**

74 To prioritize secondary metabolite BGCs from the industrial strain *P. rubens* DS68530 (derived from  
75 *Penicillium rubens* Wisconsin 54-1255 via CSI and targeted gene deletion, see **Figure 2c**), for deletion,  
76 expression levels of 49 annotated<sup>22</sup> BGC core enzymes (nonribosomal peptide synthetases (NRPS),  
77 polyketide synthases (PKS) and hybrid enzymes thereof) were extracted from 22 publicly and 4 in-house  
78 available transcriptome data sets (**Supplementary Information SI1**) and grouped into high and low  
79 penicillin production conditions (**Supplementary Information SI2**). Penicillin yield was primarily affected  
80 by strain lineage and supplementation with side-chain precursors for production of Penicillin V and G. The

81 growth rate was controlled by carbon limitation to alleviate the glucose repression of the Pen-BGC -  
82 mediated by CreA<sup>26</sup>. 17 out of 49 (35%) core BGC enzymes were not expressed in at least 22 of the 26  
83 conditions covered by the transcriptome data and were therefore considered silent. However, besides the  
84 well-expressed ACV-tripeptide forming NRPS *pcbAB* (*Pc21g21390*), genes coding for three further NRPSs  
85 showed expression across multiple strain backgrounds under glucose-limited growth rates at 0.05 h<sup>-1</sup> and  
86 below. As displayed in (**Figure 1**), these are *Pc21g12630* - *chyA*, located in the chrysogine BGC<sup>27,28</sup>,  
87 *Pc21g15480* - *roqA* in the roquefortine cluster<sup>29</sup> and the NRPS producing fungisporin<sup>30</sup> (*Pc16g04690* -  
88 *hcpA*). Four other BGC core genes (**Supplementary Information SI1**) showed fluctuating and lower  
89 expression under some conditions analyzed here, including *Pc21g05070* (*sorA*) and *Pc21g05080* (*sorB*),  
90 coding for 2 PKSs required for sorbicillin biosynthesis<sup>31</sup>. However, the mutation L146F in the ketosynthase  
91 domain of SorA of *P. rubens* DS68530 was shown to result in a non-functional enzyme<sup>32</sup>. Similar to this  
92 observation, increased expression of *Pc16g11480* (encoding a PKS termed PKS7) was observed when  
93 strains were grown in shake flasks. PKS7 carries a mutation (A952D) in a putative linker region between  
94 domains, which could potentially affect enzyme functionality. *Pc18g00380*, coding for a NRPS-like gene  
95 (NRPS-like7) was constantly expressed at 10 to 15% of the actin expression level without having acquired  
96 any mutations during CSI, and no known metabolite has been associated to this core enzyme of a BGC.  
97 The remaining BGC core genes showed only very little expression and might thus not contribute  
98 significantly to the metabolite fingerprint of *P. rubens* under the tested cultivation conditions.

99 Overall, these data suggest that the identified BGCs have a stronger impact on the hosts secondary  
100 metabolite fingerprint due to increased product formation when the penicillin BGC is lower expressed or  
101 completely deleted. Indeed, the encoded NRPSs belong to BGCs which were characterized previously as  
102 abundant products in the culture broth<sup>29,30,33</sup> of strains lacking the penicillin BGC. Therefore, the chrysogine  
103 and roquefortine BGCs along with the fungisporin-producing NRPS *hcpA* were prioritized for deletion.

## 104 **Construction and genomic analysis of a *P. rubens* strain devoid of four BGCs**

105 A recently developed methodology of Cas9-aided transformation<sup>25</sup> was used for sequential and complete  
106 deletion of the prioritized BGCs and the intermediate strains 2xKO ( $\Delta hdfA$ ,  $\Delta pen$ -BGC,  $\Delta chy$ -BGC), 3xKO-A  
107 ( $\Delta hdfA$ ,  $\Delta pen$ -BGC,  $\Delta chy$ -BGC,  $\Delta roq$ -BGC::*amdS*), 3xKO-B ( $\Delta hdfA$ ,  $\Delta pen$ -BGC,  $\Delta chy$ -BGC,  $\Delta hcpA$ ::*amdS*) and  
108 4xKO ( $\Delta hdfA$ ,  $\Delta pen$ -BGC,  $\Delta chy$ -BGC,  $\Delta roq$ -BGC::*ergA*,  $\Delta hcpA$ ::*ble*) were obtained (**Figure 2 and Table 1**).  
109 Due to repeated transformations and treatment with Cas9 RNPs, the genome of *P. rubens* 4xKO was  
110 analyzed for mutations not previously reported in this strain lineage<sup>18</sup>, using DS68530 as the reference  
111 strain. We observed 46 mutations in 4xKO, of which 18 mutations were located in 12 genes and the

112 remaining mutations were intergenic. Remarkably, 13 of the 46 identified mutations were also present in  
113 DS68530 at frequencies below 50% in the population of spores used to generate material for gDNA and  
114 sequencing, suggesting that these mutations were then further enriched during clone selection and strain  
115 construction steps we conducted. The 18 genic mutations were classified as frameshift (1), intronic (1),  
116 non-synonymous SNP (12) or synonymous SNPs (4). Mutated genes encode for low-expressed hypothetical  
117 proteins where no clear biological role was immediately conclusive (**Supplementary Information S13**) and  
118 did not contain a sgRNA off-target-site. Additionally, we also Sanger-verified the putative off-target sites  
119 with less than 4 mismatches and no bulges on the RNA or DNA of the five sgRNAs used during the  
120 transformation by PCR amplification and amplicon sequencing. None of these off-target sites did contain  
121 a mutation (**Supplementary Information S14**), hence the applied Cas9-RNP method did not lead to off-  
122 target mutations in our hands, but the process of repeated transformations and selection caused a few  
123 novel mutations. This is not surprising as removal of the 8 pen-BGC copies from DS17690 also resulted in  
124 an accumulation of 18 previously not observed genic SNPs in the derived strain DS68530<sup>34</sup>. Moreover, it  
125 was also reported for *Aspergillus fumigatus*<sup>35</sup> that spontaneous mutations can occur in the absence of  
126 Cas9. Also, no larger deletions or insertions were identified among the SNPs which were observed in  
127 *Aspergillus niger* capable of performing NHEJ<sup>36</sup>. The *P. rubens* strains utilized here are devoid of *hdfA/ku70*  
128 and thus, homology-directed repair (HDR) will be the dominant mechanism for DNA damage, therefore  
129 additionally limiting the possibility of mutations. Taken together, the obtained 4xKO strain does carry very  
130 few new mutations compared to the parental strain DS54468 which are not caused by repeated treatment  
131 with Cas9 RNPs, stressing that our applied methodology is efficient and reliable.

132

### 133 ***P. rubens* devoid of four BGCs shows low secondary metabolite levels**

134 The 4xKO strain as well as the intermediate 2xKO, 3xKO-A and 3xKO-B strains, and the parental strain  
135 DS47274 (1x *pen-BGC*) (see Figure 2b) were subjected to shake-flask cultivations using secondary  
136 metabolite production (SMP) medium<sup>37</sup>. The culture supernatant was subjected to LC-MS to identify  
137 changes in secondary metabolite profiles from day 2 to 7 of cultivation (**Figure 2, Supplementary**  
138 **Information S15, Supplementary information S16**).

139 Importantly and as expected, the total ion chromatograms of untargeted LC-MS runs (**Supplementary**  
140 **information S17A**) of the 4xKO strain revealed that all penicillin, chrysogine, roquefortine and fungisporin-  
141 related metabolites were absent. In the intermediate strains, differential responses in secondary

142 metabolite profiles were apparent. As shown in Figure 2, the level of chrysogine increased moderately (1.5  
143 fold on day 5) upon deletion of the Pen-BGC while the level of modified chrysogines (chrysogine 6, 9 and  
144 10) increased up to 29-fold (**Supplementary Information SI6**). However, these compounds are only a  
145 minor fraction (with normalized peak areas between  $10^3$  to  $10^5$ ) of all produced secondary metabolites  
146 whereas chrysogine is present in high quantities (normalized peak areas at  $10^7$ ) already after 48 h but does  
147 not accumulate further throughout the cultivation (**Supplementary Information SI6**). Besides, the levels  
148 of histidyltryptophanyldiketopiperazine (HTD) and meleagrins decreased to 0.35- and 0.1-fold of wildtype  
149 levels, respectively, while fungisporin related compounds (e.g. YFVV, VFWV) remained almost unchanged.

150 After deletion of the chrysogine BGC (Chy-BGC), an almost 4-fold increase of HTD levels (normalized peak  
151 areas at  $10^6$ ) and a 2.8-fold increase in meleagrins levels was observed together with up to 16-fold more  
152 of the linearized fungisporin<sup>30</sup> tetrapeptides consisting of tyrosine, phenylalanine and valine (YFVV, VFVY,  
153 FVVY) while tryptophan-containing tetrapeptides (YWVV, VYVV, VVVY) increased only by 1.7-fold (**Figure**  
154 **2c**). Upon deletion of the roquefortine BGC (Roq-BGC), the product pattern of fungisporins was changed  
155 and a 45-fold increase of tryptophan-containing tetrapeptides was detected, whereas the increase in non-  
156 tryptophan-containing tetrapeptides was only 2-fold. Similarly, when the fungisporin NRPS gene *hcpA*<sup>30</sup>  
157 was deleted, a 5.8-fold increase of meleagrins compared to levels in DS27472 was observed. Additionally,  
158 expression of remaining BGC core genes in the 4xKO strain were quantified using qPCR after 5 days of  
159 growth in shake flasks using SMP (**Supplementary information SI8A**). Of the 45 remaining SM core genes,  
160 7 genes showed an increased expression with  $\log_2$  FC > 2, however all genes were expressed with a relative  
161 expression level below 5% of the reference actin. The extracellular metabolome of the 4xKO strain was  
162 also analyzed for the appearance of novel peaks and filtered for changes in m/z abundance using XCMS<sup>38</sup>.  
163 Albeit we detected numerous m/z features with a  $\log_2$  FC greater than 2, only 5 features had a relative  
164 peak area greater than  $1 \times 10^6$ . Also, multiple features with an m/z greater than 750 (**Supplementary**  
165 **information SI7**) were observed. Since no proteins were precipitated prior to analysis of the broth, it might  
166 be possible that some of these higher molecular weight features can be related to protein fragments. In  
167 conclusion, we did not observe unexpected changes in the secondary metabolites excreted by the 4xKO  
168 strain, which represents a strain with a reduced extracellular secondary metabolite metabolome we  
169 characterized further on.

## 170 **Characterization of *P. rubens* devoid of four BGCs using chemostat cultivation**

171 LC-MS data indicated changed patterns in BGC related products of intermediate strains which are likely  
172 caused by altered amino acid availability due to deletion of BGCs that require specific amino acids and thus

173 draining the available pools for these amino acids. Therefore, a quantification of intracellular amino acids  
174 levels in the 4xKO strain was performed under steady-state growth conditions, which can be controlled in  
175 glucose-limited chemostats.

176 The maximum growth rate ( $\mu_{\max}$ ) on glucose of two glucose-limited batch cultivations was found to be  
177 similar, i.e.  $0.15 \pm 0.001 \text{ h}^{-1}$  and  $0.14 \pm 0.003$  for DS54468 and 4xKO, respectively. A growth rate of  $0.05 \text{ h}^{-1}$   
178 was selected for glucose-limited chemostat cultivations for both strains, as under these conditions there  
179 is acceptable production of penicillin<sup>39</sup> while this resembles the growth rate of *P. rubens* on lactose<sup>40,41</sup>,  
180 the carbon source used in SMP medium. A comparison of biomass concentration at several points during  
181 steady state between both strains revealed a slight increase of 6% in biomass concentration ( $6.59 \pm 0.153$   
182 g/kg for DS54468 and  $6.98 \pm 0.054$  g/kg for 4xKO;  $p=0.0034$ , two-tailed students t-test,  $n=5$  for DS54468  
183 and  $n=7$  for 4xKO) while dissolved oxygen tension (DOT), CO<sub>2</sub> production, O<sub>2</sub> consumption and base  
184 addition remained unchanged (**Supplementary Information SI9**). Morphology of both strains was  
185 regularly checked microscopically. Both strains appeared similar in length and aggregation of hyphae  
186 during exponential and steady state phase (**Supplementary Information SI10**).

187 To examine possible changes in amino acid pool in the 4xKO strain, mycelium samples from chemostat  
188 cultivations of DS54468 and 4xKO were analyzed using LC-MS. The analysis of intra- and extracellular  
189 amino acids (**Figure 2d**) indicated an overall modest change in amino acid levels with 13 out of 19  
190 quantified intracellular amino acids remaining unchanged. However, a significant change occurred for  
191 sulfur-containing and aromatic amino acids. While intracellular levels of cysteine remained unaltered ( $0.8$   
192  $\pm 0.4 \mu\text{M/g CDW}$ ), the extracellular level decreased from  $2.3 \text{ nM}$  to  $1.7 \text{ nM}$  ( $-0.37 \log_2 \text{ FC}$ ) whereas the  
193 intracellular concentration of methionine was reduced from  $0.09 \pm 0.03 \mu\text{M/g CDW}$  in DS54468 to  $0.02 \pm$   
194  $0.01 \mu\text{M/g CDW}$  in the 4xKO strain ( $\log_2 \text{ FC}$  of  $-1.86$ ) and was completely undetectable in the culture  
195 supernatant of 4xKO (DS54468:  $0.2 \text{ nM}$ ,  $\log_2 \text{ FC}$  of  $-5.0$ ). All aromatic amino acids increased at a  $\log_2 \text{ FC}$  of  
196 around  $0.5$  (Trp:  $0.11 \pm 0.05 \mu\text{M/g CDW}$ ; Tyr:  $0.42 \pm 0.07 \mu\text{M/g CDW}$ ; Phe:  $0.55 \pm 0.06 \mu\text{M/g CDW}$ ) in the  
197 4xKO strain. Additionally, an increase of intracellular ( $\log_2 \text{ FC}$  of  $1.74$ ) and extracellular ( $\log_2 \text{ FC}$  of  $2.22$ )  
198 nicotinic acid (NAC,  $[m+H]^+ = 124.0393 \text{ m/z}$ ) was observed. This metabolite is produced from tryptophan  
199 and acts as a precursor of nicotinamide adenine dinucleotide (NAD). The intracellular level of valine  
200 remained unchanged ( $3.2 \pm 0.8 \mu\text{M/g CDW}$ ), however the valine level in the culture broth increased from  
201  $0.03 \text{ nM}$  to  $0.23 \text{ nM}$  ( $2.73 \log_2 \text{ FC}$ ) and the intracellular concentration of  $\alpha$ -amino adipic acid increased by  
202 a  $\log_2 \text{ FC}$  of  $0.47$  in the absence of the penicillin BGC. Similarly, a moderate increase of histidine, the  
203 precursor for HTD and roquefortine was measured with concentrations increasing from  $1.2 \pm 0.2 \mu\text{M/g}$



204 CDW in DS54468 to  $1.7 \pm 0.3 \mu\text{M}/\text{g CDW}$  in the 4xKO strain ( $\log_2$  FC of 0.49). While the intracellular level  
205 of alanine, a precursor for chrysoeine, remained unchanged ( $32.5 \pm 4.5 \mu\text{M}/\text{g CDW}$ ) no extracellular  
206 alanine was detected in the culture supernatant of 4xKO (DS54468: 6.5 nM,  $\log_2$  FC of -5.0). The  
207 intracellular and extracellular level of GlcNAc increased by  $\log_2$  FC 2.02 and 1.62, respectively. Overall the  
208 changes we observe here are modest but indicate the increased levels of amino acids in the absence of  
209 utilizing BGCs.

## 210 **Transcriptome profile of *P. rubens* 4xKO displays distinct expression changes**

211 Samples for transcriptome analysis by RNA-sequencing (RNA-seq) were taken from steady state chemostat  
212 cultivations and analyzed for changes in transcripts, resulting in 4274 differently expressed genes  
213 (**Supplementary Information SI11 and SI12**). Out of the 45 remaining BGC core genes, three NRPS-like and  
214 a single PKS (Pc21g00960) showed a  $\log_2$  FC  $>2$ , however, none of these genes was expressed above a  
215 level of 2% relative to actin, showing that silent BGC clusters were not activated in our 4xKO strain  
216 consistent with the lack of new secondary metabolites in the extracellular metabolite profile.

217 We next aimed to identify changes in transcript abundance that resulted from absence of the four BGCs  
218 and are not solely due to a reduction of the penicillin synthesis burden. We retrieved expression changes  
219 from available microarray datasets comparing high-versus-low penicillin production condition for the  
220 differently expressed genes identified by RNA-seq and calculated z-scores for each gene (**Figure 3a**). This  
221 was possible for 3834 genes (87.9% of the differently expressed genes) with trackable expression behavior  
222 in at least 50% of the considered microarray datasets. Among these, 1594 genes (41.6%) were expressed  
223 very similar ( $|z| < 0.2$ ) compared to strains where production pressure was reduced by omitting the  
224 addition of the penicillin sidechain precursors phenoxyacetic acid or phenylacetic acid to the culture  
225 medium. A subset of 2077 genes showed an altered expression with  $0.2 < z < -0.2$ . Very different expression  
226 behavior was observed for 82 genes with z above 1.25 and 81 genes had a z-score below -1.25, mainly  
227 covering BGC-related genes that were deleted (**Figure 3b and Supplementary Information SI13**). It was  
228 also possible to track genes with a higher  $\log_2$ -FC showing similar responses (**Supplementary Information**  
229 **SI14**). FunCat enrichment analysis (**Figure 3c and Supplementary Information SI14**) of genes with  $|z| > 0.2$   
230 identified 20 categories as enriched ( $p < 0.05$ ), amongst them metabolism, biosynthesis and degradation  
231 of phenylalanine, supporting further analysis of the gene set by mapping it to KEGG<sup>42</sup> Pathways (**Figure 3d**  
232 **and Supplementary Information SI16**).



233 Indeed, this gene set contained several genes that were involved in synthesis of the aromatic amino acids  
234 tryptophan, tyrosine and phenylalanine, which showed an increased abundance in the 4xKO strain. The  
235 entry reaction into the shikimate pathway is mediated by the 3-deoxy-7-phosphoheptulonate synthase  
236 (Pc18g02920, log<sub>2</sub> FC 0.5) and subsequent enzymes showed also increased expression such as the  
237 anthranilate synthase (Pc13g12290, log<sub>2</sub> FC 0.4). Further, the fate of aromatic amino acids differs, as the  
238 expression of the tryptophan synthase (Pc22g00910 log<sub>2</sub> FC -1.4) is decreased in 4xKO, but further  
239 conversion of tryptophan to nicotinic acid is presumably enhanced because of increased expression of the  
240 kynureninases Pc22g20570 and Pc22g11870 (log<sub>2</sub> FC 0.3 and 0.3, respectively) as well as the 3-  
241 hydroxyanthranilate 3,4-dioxygenase Pc20g09330 (log<sub>2</sub> FC of 0.2). A decreased expression of tyrosinase  
242 (Pc22g18500, log<sub>2</sub> FC -2.4) was noted which is presumably involved in formation of melanin. The second  
243 reaction in the catabolic route of tyrosine, the conversion of 4-hydroxyphenylpyruvate into homogentisate  
244 was upregulated with increased expression of the 4-hydroxyphenylpyruvate dioxygenase Pc22g07130  
245 (log<sub>2</sub> FC 0.4). The observed increase of phenylalanine levels seems to trigger an increased expression of  
246 Pc12g09020 (log<sub>2</sub> FC 0.5), coding for a maleylacetoacetate isomerase, which is involved in phenylalanine  
247 degradation.

248 Also, an increased degradation of purines by adenosine deaminase (Pc06g00210, log<sub>2</sub> FC 2.7) and guanine  
249 deaminase Pc16g11230 (log<sub>2</sub> FC 0.6) might occur, while the adenine deaminase (Pc16g10530) showed  
250 decreased expression (log<sub>2</sub> FC -0.5). Further downstream reactions in this pathway were also found to be  
251 upregulated, such as expression of IMP dehydrogenase (Pc13g07630, log<sub>2</sub> FC 1.8), IMP and pyridine-  
252 specific 5'-nucleotidase (Pc12g13510, log<sub>2</sub> FC 0.5) and xanthine dehydrogenase (Pc22g06330, log<sub>2</sub> FC 0.6),  
253 while expression of the putative urate oxidase encoded by Pc22g20960 was decreased (log<sub>2</sub> FC of -1.3).  
254 The adenosyl homocysteinase encoded by Pc16g05080 was lower expressed (log<sub>2</sub> FC -0.3), putatively  
255 providing less adenosine. Also, expression of genes involved in pyrimidine biosynthesis was changed,  
256 namely the lower expression of the 4-amino-5-hydroxymethyl-2-methylpyrimidine phosphate synthase  
257 THI5 homolog encoded by Pc21g15700 (log<sub>2</sub> FC -0.7) and an increased expression of the cytosine  
258 deaminase Pc16g10090 (log<sub>2</sub> FC 0.5).

259 The biosynthesis of ribose 5-phosphate (R5P), the precursor required for purine biosynthesis and the  
260 pentose phosphate pathway was also found to be downregulated as the ribose 5-phosphate isomerase  
261 encoded by Pc22g21440 showed decreased expression (log<sub>2</sub> FC -0.8). The link between the pentose  
262 phosphate pathway and glycolysis was also decreased as the Pc21g16950-encoded transaldolase was  
263 lower expressed (log<sub>2</sub> FC -0.4), presumably resulting in an accumulation of D-arabitol, as the NADP+

264 dependent D-arabinitol dehydrogenase Pc16g08460 showed increased expression (log<sub>2</sub> FC 1.2).  
265 Interestingly, it was found that the 6-phosphofructo-2-kinase Pc20g01550 (log<sub>2</sub> FC 0.5) also showed  
266 increased expression. This is insofar interesting as the product, fructose-2,6-bisphosphate, strongly  
267 activates glycolysis through allosteric activation of phosphofructokinase 1. Further, we also found  
268 decreased expression of 2 pyruvate decarboxylase enzymes, encoded by Pc18g01490 (log<sub>2</sub> FC - 0.7) and  
269 Pc13g09300 (log<sub>2</sub> FC -0.6) which break down pyruvate into acetaldehyde and carbon dioxide, during  
270 anaerobic fermentation. Also, the carbonic anhydrase Pc22g06300 (log<sub>2</sub> FC -0.6) was downregulated,  
271 which indicates that there might be less induction of these enzymes in the 4xKO strain.

272 Regarding the decrease in methionine and cysteine, this can perhaps be explained by decreased sulfur  
273 supply, as the phosphoadenosine phosphosulfate reductase Pc20g03220 was lower expressed (log<sub>2</sub> FC -  
274 0.5). This enzyme is required for fixation of inorganic sulfur via sulfite on 3'-phosphoadenosine-5'-  
275 phosphosulfate (PAPS). In addition, an increase of the cysteine dioxygenase expression (Pc21g04760, log<sub>2</sub>  
276 FC 1.7), initiating the conversion of cysteine into taurine or degradation to sulfate was observed and might  
277 cause a decrease in methionine. Moreover, the cystathionine gamma-lyase (Pc21g05430, log<sub>2</sub> Fc -0.8)  
278 breaking down cystathionine into cysteine,  $\alpha$ -ketobutyrate and ammonia was downregulated. The lack of  
279 methionine might have been sensed by the cell as the L-methionine (R)-S-oxide reductase Pc20g05770  
280 showed decreased expression (log<sub>2</sub> FC -0.4). Since methionine and the related S-adenosylmethionine  
281 (SAM) act as cellular nutrient state sensors and have a significant impact upon regulation of autophagy<sup>43,44</sup>,  
282 the decrease in methionine levels also explains the upregulation of 11 autophagy-associated genes (log<sub>2</sub>  
283 FC between 0.25 and 0.47, **Supplementary Information SI16**), amongst them the well-expressed (497.3  
284 RPKM in DS54468) autophagy-related protein 8 (Atg8), encoded by Pc12g05370 (log<sub>2</sub> FC 0.26). Atg8 is  
285 required for the formation of autophagosomal membranes during macroautophagy<sup>45</sup> and is coupled to  
286 phosphatidylethanolamine (PE) by the cysteine protease Atg4<sup>46</sup> (Pc20g08610, log<sub>2</sub> FC 0.28). An increased  
287 expression of these genes is already observed when lowering the penicillin biosynthesis burden, as  
288 indicated by  $|z| < 0.2$  (**Supplementary Information SI13**). One exception is Pc12g10930 ( $z = -0.31$ , log<sub>2</sub> FC  
289 of 0.47), encoding for the autophagy-related protein 13 (Atg13) that interacts with Atg1<sup>47</sup> and whose  
290 phosphorylation status mediates interactions with other autophagy related proteins<sup>45</sup>. Here, an increased  
291 expression of *atg13* might suggest a further increase in autophagy as compared to strains still capable of  
292 producing penicillin. This could also result in an increased degradation of peroxisomes, which has been  
293 shown to be regulated by *atg1* in *P. rubens*<sup>48</sup>.

294 Taken together, these changes in gene expression are consistent with a reduced cellular demand for amino  
295 acids in the absence of the four highly expressed BGCs. It appears that the 4xKO cells redirect gene  
296 expression to avoid accumulation of aromatic amino acids. Also, since tryptophan and adenine are  
297 normally required for synthesis of NAD and NADP, having an increased pool under high-penicillin-  
298 production conditions<sup>49</sup> is beneficial. However, these reservoirs trigger increased expression of  
299 degradation enzymes when demands are decreased as observed in the 4xKO strain. Overall, these changes  
300 suggest that the obtained strain will be suitable for the integration of heterologous gene clusters and  
301 expression thereof. To verify this, we next set out to overexpress endogenous and integrate heterologous  
302 secondary-metabolite related genes.

### 303 ***P. rubens* platform strain is suitable for multi-part donor DNA assembly and** 304 **achieves increased yield of PKS-derived YWA1**

305 To evaluate the secondary metabolite deficient strain as a platform, we first re-introduced the pen-BGC  
306 into the intergenic region (IGR) between Pc20g07090 and Pc20g08100 using *in vivo* homologous  
307 recombination using up to 8 DNA fragments with only 100 basepair overlap between fragments. We used  
308 two strategies for this approach, maintaining the native configuration of the cluster or replacing the  
309 promoters by the stronger p40s<sup>50</sup> promoter (**Figure 5a**). While the first strategy led to a higher  
310 transformant number and successful integration, we observed a higher frequency of multiple gene copies  
311 being integrated when p40s was used, suggesting that recombination of very similar parts is less successful  
312 and prone to errors (**Figure 5b and Table 1**). The recombination was successful as evidenced by the  
313 concentration of penicillin V after five days of growth in SMP medium supplemented with phenoxyacetic  
314 acid (POA) (**Figure 5c**), even though the concentration of penicillin V was slightly lower for the recombined  
315 strains as compared to DS56830-penBGC and the reference strain for single-copy Pen-BGC production,  
316 DS54468. Investigation of the expression of all pen-BGC genes revealed high levels of expression in  
317 DS56830-penBGC and the strains expressing the pen-BGC genes from the p40s promoter (**Figure 5d**). The  
318 pen-BGC was similarly expressed in the 4xKO strain-compared to the parental strain DS54468. Our results  
319 indicate that we can re-assemble a complete BGC from up to 8 DNA fragments with short homology  
320 successful, allowing efficient BGC pathway assembly with high functionality.

321 To further explore the performance of the platform strain, the polyketide synthase PKS17 (Pc16g1700)  
322 which is not expressed in *P. rubens* under submerged cultivation conditions was overexpressed by placing  
323 it under control of the pIPNS promoter (**Figure 4a**). Pc16g1700 encodes an iterative, non-reducing type I  
324 PKS, termed PKS17 or *pcAlb1*, producing the heptaketide naphthapyrone YWA1 by condensation of one

325 acetyl-CoA and six malonyl-CoA moieties. YWA1 is the precursor for dihydroxynaphthalene (DHN)-melanin  
326 in several fungi<sup>51</sup> and the BGC encoding the required enzymes is present in *P. rubens*<sup>52</sup>. Replacing the native  
327 promoter by pIPNS resulted in production of YWA1 in both DS68530-PKS17-OE and 4xKO-B-PKS17-OE,  
328 whereby the latter strain background increased the production of YWA1 by 25% on day 3 and by 600% on  
329 day 5 (**Figure 4b**). qPCR was used to measure expression of Pc16g1700 on day 5, and this showed no  
330 significantly different expression between DS68530-PKS17-OE and 4xKO-B-PKS17-OE (**Figure 4c**). Although  
331 YWA1 is further processed into insoluble pigments which were not quantified further, these results  
332 indicate that the supply of precursors for YWA1, malonyl-CoA and acetyl-CoA could be increased in the  
333 4xKO background strain. Indeed, data from chemostat cultivations of 4xKO showed that Pc13g03920,  
334 encoding the *P. rubens* ortholog for the *S. cerevisiae* acetyl-CoA carboxylase (ACC) *SceACC*<sup>53</sup> (UniProt  
335 Q00955.2) displayed a moderate increased expression (log<sub>2</sub> FC of 0.36). ACC catalyzes the rate-limiting  
336 step in fatty-acid biosynthesis, the carboxylation of acetyl-CoA to malonyl-CoA, which is the limiting  
337 substrate for the biosynthesis of fatty acids via fatty-acid synthase<sup>54</sup>. Since the biosynthesis of YWA1  
338 presents a drain for malonyl-CoA, an increased supply of malonyl-CoA via ACC could explain the increased  
339 level of YWA1. Our experiments show that the obtained 4xKO strain is suitable for producing increased  
340 amounts of the polyketide YWA1.

### 341 **Integration of heterologous Calbistrin gene cluster into the *P. rubens* platform** 342 **strain results in production of decumbenones**

343 To demonstrate that the obtained 4xKO platform strain is suitable for integration of heterologous BGCs,  
344 we integrated the calbistrin-BGC (cal-BGC) recently identified in *Penicillium decumbens*<sup>55</sup>. The products of  
345 the Cal-BGC are calbistrins and decumbenones, with the latter known to impair melanization of  
346 *Magnaporthe grisea*<sup>56</sup>, the cause of rice blast. Integration of the Cal-BGC into the genome of *P. rubens*  
347 4xKO-B (**Table 1**) was achieved via *in vivo* homologous recombination (**Figure 6a and Supplementary**  
348 **Information SI17**). After liquid cultivation, we detected the linear moiety (dioic acid), decumbenone A, B  
349 and C but no Calbistrin A, C and versiol in both CYA and SMP medium samples of 4xKO-B-calBGC (**Figure**  
350 **6b and Supplementary Information SI18**). Since our previous study could not rule out the possibility of a  
351 second PKS producing the linear moiety required for synthesis of calbistrins, we examined *P. rubens* for a  
352 possible upregulation of closely related PKSs with a potential homolog present in the calbistrin producers  
353 *A. versicolor*, *A. aculeatus*, *P. decumbens* and *C. tofieldiae*. The qPCR measurements did reveal a moderate  
354 increase in gene expression for Pc16g04890 (log<sub>2</sub> FC of 1.3, **Supplementary Information SI19**), containing  
355 a C-methylation domain and an enoyl-reductase domain, structurally resembling a highly-reducing PKS<sup>57</sup>

356 proposed to be necessary for synthesis of the linear moiety, however the confirmation of this hypothesis  
357 requires further experimental validation. Since we did not observe production of calbistrin A and C, this  
358 could suggest either a non-clustered broad specificity transesterase forms the ester bond of the calbistrins  
359 or hydrolysis of calbistrins is occurring very rapidly in *P. rubens*.

360 Expression of the Cal-BGC reduced biomass production of *P. rubens* cultured in SMP medium and also  
361 abolished spore pigmentation (**Supplementary Information SI20**). However, for 4xKO-B-calBGC, the level  
362 of all decumbenones were increased in SMP medium at least one-fold when compared to CYA (**Figure 6c**  
363 **and Supplementary Information SI18**) with maximum levels observed on day 5 of growth. Besides reduced  
364 amounts of decumbenones, we also observed appearance of a significant peak on day 7 in 4xKO-B-calBGC,  
365 composed of 3 m/z: 255.122, 273.132 and 290.159 (**Figure 6d**), not observed in *P. decumbens*, suggesting  
366 degradation of decumbenones. Taken together, these observations indicate that the Cal-BGC contains all  
367 relevant genes for production of decumbenones and these can be successfully transferred to *P. rubens* for  
368 heterologous expression and high-level production.

## 369 **Conclusions**

370 In this study, the consecutive deletion of well-expressed BGCs led to a secondary metabolite deficient  
371 strain of *P. rubens* that is suitable for integration and *in vivo* assembly of heterologous BGCs. By the use of  
372 *in vivo* homologous recombination employing multiple DNA fragments, a complete BGC can be  
373 reassembled while introducing at the same time promoters to enhance the expression. This methodology  
374 speeds up fungal synthetic biology leading to more freedom in the design-build-analyze-cycle. A major  
375 advantage of the platform strain is that novel heterologous compounds can be purified with reduced  
376 interference from endogenous secondary metabolites. We demonstrated this approach by heterologous  
377 expression of the calbistrin BGC from *Penicillium decumbens*, obtaining the melanization-inhibiting  
378 decumbenones as final products.

379 During the construction of the platform strain, intermediate strains were obtained with a different set of  
380 highly expressed NRPS genes. Metabolic profiling revealed an interesting interplay between the various  
381 NRPS enzymes. Because the substrate requirements of the enzymes PcbAB, ChyA, RoqA and HcpA show a  
382 certain degree of overlap, they likely compete for substrates and thus deletion of one BGC can result in  
383 higher levels of metabolites produced by the other BGCs. For instance, chrysogine biosynthesis seems to  
384 prevent accumulation of both roquefortine and fungisporine-related molecules by acting as a sink for

385 anthranillic acid, the precursor for tryptophan biosynthesis. Since the chrysogine BGC is expressed under  
386 conditions required for penicillin biosynthesis, a deletion of the chrysogine BGC in a Pen-BGC strain might  
387 lead to a decreased penicillin production and shift the metabolic fingerprint to roquefortine-related  
388 molecules. The low expression of the remaining SM core genes in the 4xKO strain created here contributes  
389 to the clean secondary metabolite profile as indicated by the LC-MS data and adds to the applicability of  
390 this strain as a platform for secondary metabolism.

391 Our study also suggests that the demand for cysteine due to penicillin production naturally increases  
392 sulphate uptake via Suta/SutB and thus ensures higher methionine levels that decrease the autophagy  
393 response. The majority of amino acids did not display severe intracellular changes under the conditions  
394 utilized here, except methionine and nicotinic acid, the degradation product of tryptophan, suggesting  
395 that CSI of *P. rubens* towards an increased yield of  $\beta$ -lactams did not result in a major impact on the cells  
396 ability to regulate amino acid metabolism by either reducing synthesis (methionine) or increasing  
397 degradation (tryptophan) of excess amino acids. Except for an extracellular increase of valine, other amino  
398 acid levels did not change drastically, hence the metabolism remains sufficiently flexible after CSI to  
399 respond to a decreased demand of certain amino acids. This will make the strain characterized here  
400 suitable for expression of both PKS- and NRPS-containing BGCs.

## 401 **Methods**

### 402 **Data availability**

403 High-throughput sequencing data have been deposited to the NCBI Sequence Read Archive database  
404 under accession PRJNA588889 (including SRA data SRR10428545, SRR10428546, SRR10428547,  
405 SRR10428548, SRR10428549, SRR10428550 and SRR10428551).

### 406 **Fungal Strains**

407 All *P. rubens* strains utilized and created in this study can be found in (**Table 1**). Parental strains DS54468,  
408 DS68530 and DS47274 were kindly provided by DSM Sinochem B.V., now Centrient BV. *P. decumbens*  
409 strain IBT11843 was obtained from and is available at the IBT culture collection (Department of  
410 Biotechnology and Biomedicine, Technical University of Denmark).



## 411 Nucleic Acid Techniques

412 If not indicated otherwise, PCRs were conducted using KAPA HiFi HotStart ReadyMix (Roche) and 0.25  $\mu$ l  
413 of 100  $\mu$ M primer stock solution at an annealing temperature of 66 °C regardless of calculated primer  
414 melting temperature and 30 seconds elongation per 1 kbp. PCR products were purified using the GenElute  
415 kit (Sigma Aldrich) and concentrations were checked using a NanoDrop ND1000 (Thermo Fisher Scientific).

416 For amplification of donor DNA parts, the origin of PCR templates is listed in **Supplementary information**  
417 **SI21**. For design of nucleic acid constructs and inspection of Sanger sequencing results, SnapGene (GSL  
418 Biotech) was used. For isolation of gDNA, the E.Z.N.A. HP Fungal DNA kit (Omega Biotek) was used to  
419 extract gDNA from 200 to 300 mg of wet or dried fungal biomass.

420 For qPCR analysis, mycelium for RNA extraction was collected by filtration, washed with ice-cold H<sub>2</sub>O. 100  
421 to 200 mg wet biomass were mixed with 1 ml TRIzol reagent (Thermo Fisher Scientific), transferred into  
422 tubes containing glass beads and stored at -80 °C until RNA isolation. Mycelium was disrupted with a  
423 FastPrep FP120 system (Qbiogene) and total RNA was isolated using the Direct-zol RNA MiniPrep Kit (Zymo  
424 Research). For cDNA synthesis, 1500 ng total RNA were reverse transcribed using the Maxima H Minus  
425 cDNA Synthesis Master Mix (Life Technologies) in a volume of 20  $\mu$ l. Samples were diluted with 80  $\mu$ l MQ-  
426 H<sub>2</sub>O and 4  $\mu$ l were used as input for qPCR in a final volume of 25  $\mu$ l. As master mix for qPCR, the SensiMix  
427 SYBR Hi-ROX (Bioline Reagents) was used. All runs were performed on a MiniOpticon system (Bio-Rad).  
428 The following conditions were employed for amplification: 95 °C for 10 min, followed by 40 cycles of 95°C  
429 for 15 s, 60°C for 30 s and 72°C for 30 s, following an acquisition step. Raw  $c_t$  data were exported and  
430 analysis of relative gene expression was performed with the 2- $\Delta\Delta$ CT method<sup>58</sup>. The expression analysis  
431 was performed with two technical duplicates per biological sample. The  $\gamma$ -actin gene (Pc20g11630) was  
432 used as internal standard for data normalization. Primers for qPCR were designed using NCBI Primer  
433 BLAST<sup>59</sup>. All primers used for qPCR are listed in **Supplementary information SI21**. When appropriate, copy  
434 numbers of integrated donor DNA were analyzed using qPCR with extracted genomic DNA as an input  
435 according to Polli et al<sup>60</sup>.

436 RNA for RNA-seq was isolated from chemostat-cultured mycelium which was obtained by sampling 10 ml  
437 broth, vacuum filtration and brief washing with water before freezing in liquid nitrogen and storing at -  
438 80°C until RNA extraction. For RNA extraction, mycelium was ground in liquid nitrogen followed by TRIzol-  
439 chloroform and isopropanol treatment to precipitate total RNA. A further purification step was done using  
440 the Nucleospin RNA clean-up Kit (Machery-Nagel), following storage of samples at -80 °C until shipping for



441 RNA-seq analysis on dry ice. From each sample, 10 µg were submitted for generation of  $2 \times 10^6$  50 bp single-  
442 end reads (50 bp) on a BGISEQ-500 (BGI).

443

## 444 **Fungal Techniques**

445 Protoplasts of *P. rubens* strains were obtained 48 hours post spore seeding in YGG medium and  
446 transformed using the methods and media described previously<sup>25,37</sup>. The amount of total DNA transformed  
447 did not exceed 10 µg in a maximum volume of 50 µl. A list of all conducted transformations during this  
448 study is given in **Table 1**.

449 Selection was carried out by utilizing transformant recovery plates containing either 0.1% acetamide  
450 (Sigma Aldrich) as only nitrogen source or 50 µg/ml phleomycin (Invivogen) or 1.2 µg/ml terbinafine  
451 hydrochloride (Sigma Aldrich) combined with 40 mM sodium nitrate as nitrogen source. After  
452 transformants recovered, colonies were counted and analyzed by colony PCR using the Phire Plant Direct  
453 PCR Kit (Thermo Fisher Scientific) to confirm integration of donor DNA elements at the desired genomic  
454 locus.

455 When appropriate, PCR products were purified using ExoSAP-IT PCR Product Cleanup Reagent (Thermo  
456 Fisher Scientific) and sent for sequencing (Macrogen) with suitable primers. Correct clones were purified  
457 by two to three cycles of sporulation and subsequent spore plating on selective media. For sporulation,  
458 fungal cultures were maintained on R-Agar<sup>61</sup> for 7 to 10 days.

459 For long-term storage of strains, rice batches were prepared, lyophilized and stored at room temperature  
460 when used for inoculation of shake flask cultures. For long-term cryocultures, rice grains with attached  
461 spores were stored in 20% glycerol solution at -80°C.

462 All shake flask cultivations were performed in 100 ml flasks shaken at 200 rpm and 25°C in a shaking  
463 incubator. For precultures, 25 ml YGG medium<sup>61</sup> was inoculated with lyophilized rice grains (between  
464  $0.2 \times 10^6$  to  $2 \times 10^6$  spores/ grain, using 1 grain per ml inoculum) and incubated for 48 h. Of that preculture 4  
465 ml (without rice grains) was used to inoculate either 26 ml SMP<sup>61</sup> or CYA<sup>62</sup> medium. When appropriate,  
466 SMP was supplemented with 2.5 g/L of phenoxyacetic acid (POA) to stimulate production of Penicillin V.  
467 Samples were harvested by vacuum filtration over cellulose filters (Sartorius) at indicated times for  
468 biomass determination and RNA isolation. The filtrated broth was further clarified using 0.2 µm

469 polytetrafluoroethylene (PTFE) syringe filter (VWR) and stored at -80°C until further analysis by HPLC  
470 analysis and LC-MS.

## 471 **Bioreactor Cultivations**

472 Cultivation was done in 7.5 L BioFlo310 bioreactors (New Brunswick Scientific). Glucose-limited chemostat  
473 cultivation was initiated by inoculation of 5 L ammonium based minimal medium (MM) pH 6.5 as described  
474 by Douma et al.<sup>63</sup>. No sidechain precursors for PenV or PenG production were added. Inoculations were  
475 performed with a conidial suspension to give 10<sup>9</sup> conidia/L cultivation medium. Germination was  
476 facilitated by addition of 0.003% (w/w) yeast extract. Temperature of 25°C and pH 6.5 were kept constant,  
477 the latter by controlled addition of 2 M NaOH or 1 M HCl, respectively. After an initial germination of 15  
478 hours, the stirrer speed was increased from 500 rpm to 750 rpm and aeration with air was changed from  
479 head space to sparger gassing (1L/min). Subsequently, polypropylene glycol 2000 (PPG) at a final  
480 concentration of 0.01% (v/v) was added as an antifoaming agent. Continuous cultivation was started in  
481 the late exponential growth phase, when 100 ml of 2 M NaOH had been added to the batch culture  
482 (biomass concentration of about 6 g dry weight per kg of culture)<sup>64</sup>. MM containing 0.01% (v/v) PPG was  
483 fed to the culture from two interconnected 20-liter reservoirs. The flow rate was 0.25 L/h, which  
484 corresponded to a dilution rate (D) of 0.05 h<sup>-1</sup>. The weight was kept constant at 5 kg using a port at the  
485 bottom of the reactor. The outflow was regulated by a magnetic valve operating at a band width of 10 g.  
486 Steady-states were defined by constant alkali addition rate, produced CO<sub>2</sub>, consumed O<sub>2</sub> and biomass  
487 concentration after more than four residence times (> 80 h). Samples were taken regularly and frozen  
488 quickly in liquid nitrogen. Mycelium harvested during steady-state conditions was used for RNA-seq  
489 analyses. Additional quadruplicate samples were taken directly into -20°C 40% methanol (20 mL) to  
490 determine intracellular amino acids. The content of CO<sub>2</sub> and O<sub>2</sub> in the exhaust gas was analyzed using an  
491 Ex-2000 Gas Analyser (New Brunswick Scientific). The pH was measured with an autoclavable glass  
492 electrode (Mettler Toledo), and the dissolved oxygen tension was measured with an InPro-6860i O<sub>2</sub> sensor  
493 (Mettler Toledo).

494

## 495 **Amino acid quantification**

496 Mycelium for amino acid analysis was harvested during steady-state according to the method described  
497 by de Jonge et al<sup>65</sup>. In brief, samples of 10 ml or less were quenched directly into -20°C 40% methanol (20

498 ml), weighted and filtered using a vacuum pump followed by a single washing 1x with the same volume of  
499 ice-cold 40% methanol before freezing in liquid nitrogen and storage at  $-80^{\circ}\text{C}$  until extraction. For  
500 extraction, filter papers with frozen sample were directly placed in 50 ml falcon tubes containing 20 ml  
501  $73^{\circ}\text{C}$  hot 75% ethanol, shaken vigorously, boiled for 3 min at  $95^{\circ}\text{C}$ , chilled on ice for 5 min, centrifuged for  
502 5 min at  $4000 \times g^{-1}$  and filtered over a  $0.2 \mu\text{m}$  cellulose acetate filter (VWR). 1 ml aliquots were  
503 concentrated in a speed-vac (Eppendorf) for 45 min at  $30^{\circ}\text{C}$ , centrifuged for 10 min at  $10.000 \times g^{-1}$ .  
504 Supernatant was stored at  $-80^{\circ}\text{C}$  if not used immediately for LC-MS analysis. All extractions were  
505 performed in quadruplicate per bioreactor run and analyzed in technical duplicate on LC-MS. Amino acid  
506 retention times were verified by a standard mixture (AAS18 Analytical standard; Sigma Aldrich) or dilutions  
507 of pure amino acids in 10 mM HCl (for Asn, Gln, Trp). Peak areas were corrected for extracted biomass and  
508 concentrations were calculated using a calibration curve.

## 509 **LC-MS analysis**

510 For analysis of broth, samples were centrifuged for 10 min at  $14,000 \times g^{-1}$  and supernatant was directly  
511 used for analysis or aliquoted and frozen at  $-80^{\circ}\text{C}$ . Separation was conducted on an Accella1250 UPLC  
512 system coupled to an Orbitrap Exactive spectrometer (Thermo Fisher Scientific, The Netherlands) with a  
513 scan range of  $m/z$  100 – 1600 Da. A sample of  $5 \mu\text{L}$  was injected onto a Shim-pack XR-ODS C18 column ( $3.0$   
514  $\times 75 \text{ mm}$ ,  $2.2 \mu\text{m}$  ID) (Shimadzu, Japan) kept at  $40^{\circ}\text{C}$  and operated at a flow rate of  $300 \mu\text{L}/\text{min}$ . Separation  
515 of compounds was achieved with the following solvents: A: 100% MQ-H<sub>2</sub>O, B: 100% Acetonitrile, and C:  
516 2% formic in MQ-H<sub>2</sub>O being constantly added at 5% to protonate molecules. After sample injection, the  
517 column was run for 5 min with isocratic flow at 5 % B, following a linear gradient for 25 min reaching 95%  
518 B, remaining constant at 95% B for 5 min and equilibrating the column with initial conditions of 5% B for 5  
519 min before injection of the next sample. Each sample was analyzed in technical duplicate. Retention times  
520 for N-acetylglucosamine, nicotinic acid and amino acids were verified with available standards (purity 99%,  
521 Sigma-Aldrich). Peak areas were extracted with Thermo Xcalibur (Version 2.2 SP1) software allowing a  
522  $\Delta m/z$  of 5 ppm to the exact mass of compound  $m/z$ . Chromatogram data in Thermo-RAW format were  
523 imported into XCMS<sup>38,66</sup> and processed with default settings to identify enriched and depleted  $m/z$ .

## 524 **HPLC-Analysis**

525 The extracellular concentration of Penicillin V was determined according to the method described by  
526 Harris et al<sup>67</sup> using a Nextera HPLC system with a Shim-pack XR-ODS 2.2 RP column (Shimadzu). Isocratic

527 separation was used for 1  $\mu$ l of 0.2  $\mu$ m filtered fermentation broth at a flow rate of 0.5 mL/min with running  
528 buffer (acetonitrile 245 g/L, 640 mg/L,  $\text{KH}_2\text{PO}_4$  and 340 mg/L phosphoric acid in Milli-Q). Peaks were  
529 detected at a wavelength of 254 nm according to the retention time of standards between 11.5 and 12  
530 minutes. Production levels were corrected for growth differences by dry weight determination. Samples  
531 were analyzed in technical duplicate.

## 532 **Transcriptome Data Processing**

533 Mapping of raw reads was performed with DNASTar Lasergene 14 Suite using the *P. rubens* assembly  
534 GCA\_000226395.1 as reference for alignment. For each biological replicate, the RPKM (Reads Per Kilobase  
535 Million) were calculated individually and replicates were averaged as the number of mapped reads was  
536 similar (**Supplementary Information SI22**). P-values were calculated using a 2-sided students t-test  
537 assuming unequal variance for each gene. Genes with an RPKM below 0.3 were considered silent or  
538 potential noise of gDNA contamination. Genes that were silent (below 0.3 RPKM) in one strain but  
539 expressed above 0.3 RPKM in the other were assigned a log<sub>2</sub> FC of 7/-7 respectively. PaintOmics<sup>368</sup> was  
540 used to generate overviews for pathways displaying changed expression patterns and for hypothesis  
541 generation of biologically relevant patterns. Statistically relevant genes were processed with FungiFun2<sup>69</sup>  
542 to identify enriched functional annotation scheme (FunCat<sup>70</sup>) categories using FDR-correction and  
543 indirectly annotated top categories. For comparison of expression changes in high versus low penicillin  
544 production conditions across different strains, z-scores were calculated. Z-scores represent the distance  
545 between the raw score (log<sub>2</sub> FC derived from RNA-seq data generated in this study) and the population  
546 mean (mean log<sub>2</sub> FC derived from multiple high versus low penicillin production conditions) in units of  
547 standard deviation. Z-scores are negative for raw scores below the mean and positive when above. The  
548 log<sub>2</sub> FC expression changes of significantly different expressed genes from this study ( $|\log_2 \text{FC}| > 0.25$ )  
549 were extracted from published microarray data (**Supplementary Information SI1**, only genes covered by  
550 at least 50% of the input microarray data sets were considered). Assuming an error rate of 5% and a normal  
551 distribution of log<sub>2</sub> FC values, the confidence interval for a significantly different expression between the  
552 conditions was calculated to be [-1.25; 1.25]. The calculated z-scores of genes were plotted over contigs  
553 of *P. rubens* aligned from 1 to 49 to identify possible clustering effects due to co-expression at the same  
554 genomic locus.

## 555 **Off-target and SNP-analysis**

556 Possible off-target sites were identified using Cas-OFFinder<sup>71</sup> and are listed in **Supplementary Information**  
557 **S123**. OFF-target sites without a bulge and less than 5 mismatches were verified by PCR amplification of  
558 the locus followed by sanger sequencing (Macrogen). Additionally, isolated genomic DNA was sent to BGI  
559 Europe (Copenhagen, Denmark) for genomic library preparation and 100 bp paired-end sequencing. From  
560 each strain, above 10 million reads were generated and > 98% were successfully mapped to the *P. rubens*  
561 Wisconsin 54-1255 genome using Breseq<sup>72</sup> to detect mutations.

## 562 **Phylogenetic Tree Construction for shared PKS in Calbistrin Producers**

563 All proteins containing a PKS\_KS superfamily domain were retrieved from NCBI via BLAST search for *P.*  
564 *rubens* Wisconsin 54-1255, *A. versicolor* CBS 583.65, *A. aculeatus* ATCC 16872, *Colletotrichum tofieldiae*  
565 0861 and *P. decumbens* IBT11843, yielding 137 proteins. Full-length-protein sequences were aligned using  
566 MUSCLE with default settings in MEGA X<sup>73</sup> and evolutionary history was inferred using 500 bootstraps and  
567 a Jones-Taylor-Thornton (JTT) model for amino acid substitutions assuming uniform rates of mutations  
568 among all sites. A total of 67 amino acid positions were used in the final dataset for tree construction. The  
569 obtained tree was inspected for branches containing proteins from all input species and expression of  
570 candidate genes was analyzed by qPCR in *P. rubens* 4xKO-B strains expressing the Cal-BGC grown for 5  
571 days in SMP medium.

## 572 **AUTHOR INFORMATION**

### 573 **Corresponding Author**

574 E-mail: [a.j.m.driessen@rug.nl](mailto:a.j.m.driessen@rug.nl) Tel: (31) 50 363 2164. Adress: Nijenborgh 7, 9747 AG, Groningen, The  
575 Netherlands.

### 576 **Author Contributions**

577 RALB and AJMD designed the experiments and conceived the study.

578 CP, AV and FP performed gene deletions and shake cultivations of strains.

579 TS and CP performed bioreactor cultivations and sampling. CP and SJ extracted samples and performed  
580 analytical experiments.

581 CP and FP analyzed mass spectrometry data.

582 CP analyzed transcriptome data.  
583 MdV performed integration of penicillin and calbistrin BGCs and performed shake-flask cultivations.  
584 LM performed shake flask cultivations, HPLC analysis and SNP data.  
585 AV performed qPCR experiments and analyzed data.  
586 CP and TS wrote the manuscript with the improvements from all authors.  
587 All authors read and approved the final manuscript.

## 588 **Acknowledgments**

589 The research leading to these results was financially supported by the BE-Basic Foundation (Biotechnology  
590 based Ecologically Balanced Sustainable Industrial Consortium), DSM Sinochem Pharmaceuticals  
591 Netherlands B. V. and the European Commission's Marie Curie Initial Training Network Quantfung (FP7-  
592 People-2013-ITN, grant no. 607332). The authors would like to thank Oleksandr Salo for technical  
593 assistance with LC-MS. Hilde E. Havinga is acknowledge for assistance with shake-flask cultivations and  
594 analysis of samples with HPLC. Sietske Grijseels and Rasmus N. Frandsen are acknowledged for valuable  
595 discussion about the calbistrin cluster. Jeroen G. Nijland is acknowledged for support with BreSeq and  
596 genome sequencing.

## 597 **Competing interests**

598 All authors declare no competing financial interests.  
599

## 600 **References**

- 601 1. Li, Y. F. *et al.* Comprehensive curation and analysis of fungal biosynthetic gene clusters of  
602 published natural products. *Fungal Genet. Biol.* **89**, 18–28 (2016).
- 603 2. Nielsen, J. C. *et al.* Global analysis of biosynthetic gene clusters reveals vast potential of secondary  
604 metabolite production in *Penicillium* species. *Nat. Microbiol.* **2**, (2017).
- 605 3. Brakhage, A. A. Regulation of fungal secondary metabolism. *Nat. Rev. Microbiol.* **11**, 21–32  
606 (2013).

- 607 4. Rutledge, P. J. & Challis, G. L. Discovery of microbial natural products by activation of silent  
608 biosynthetic gene clusters. *Nat. Rev. Microbiol.* **13**, 509–523 (2015).
- 609 5. Tudzynski, B. Nitrogen regulation of fungal secondary metabolism in fungi. *Front. Microbiol.* **5**, 1–  
610 15 (2014).
- 611 6. Nah, H.-J., Pyeon, H.-R., Kang, S.-H., Choi, S.-S. & Kim, E.-S. Cloning and Heterologous Expression  
612 of a Large-sized Natural Product Biosynthetic Gene Cluster in *Streptomyces* Species. *Front.*  
613 *Microbiol.* **8**, (2017).
- 614 7. Kim, H. U., Charusanti, P., Lee, S. Y. & Weber, T. Metabolic engineering with systems biology tools  
615 to optimize production of prokaryotic secondary metabolites. *Nat. Prod. Rep.* **33**, 933–941 (2016).
- 616 8. Harvey, C. J. B. *et al.* HEx: A heterologous expression platform for the discovery of fungal natural  
617 products. *Sci. Adv.* **4**, (2018).
- 618 9. Awan, A. R. *et al.* Biosynthesis of the antibiotic nonribosomal peptide penicillin in baker’s yeast.  
619 *Nat. Commun.* **8**, 1–8 (2017).
- 620 10. Siewers, V., Chen, X., Huang, L., Zhang, J. & Nielsen, J. Heterologous production of non-ribosomal  
621 peptide LLD-ACV in *Saccharomyces cerevisiae*. *Metab. Eng.* **11**, 391–397 (2009).
- 622 11. Clevenger, K. D. *et al.* A scalable platform to identify fungal secondary metabolites and their gene  
623 clusters. *Nat. Chem. Biol.* **13**, 895–901 (2017).
- 624 12. Bok, J. W. *et al.* Fungal artificial chromosomes for mining of the fungal secondary metabolome.  
625 *BMC Genomics* **16**, 1–10 (2015).
- 626 13. Shi, T., Liu, G., Ji, R., Shi, K. & Song, P. CRISPR / Cas9-based genome editing of the filamentous  
627 fungi : the state of the art. 7435–7443 (2017). doi:10.1007/s00253-017-8497-9
- 628 14. Smanski, M. J. *et al.* Functional optimization of gene clusters by combinatorial design and  
629 assembly. *Nat. Biotechnol.* **32**, 1241–1249 (2014).
- 630 15. Smanski, M. J. *et al.* Synthetic biology to access and expand nature’s chemical diversity. *Nat. Rev.*  
631 *Microbiol.* **14**, 135–149 (2016).
- 632 16. Nielsen, J. C. & Nielsen, J. Development of fungal cell factories for the production of secondary



- 633 metabolites : Linking genomics and metabolism. *Synth. Syst. Biotechnol.* **2**, 5–12 (2017).
- 634 17. Chiang, Y. M. *et al.* Development of Genetic Dereplication Strains in *Aspergillus nidulans* Results in  
635 the Discovery of Aspercryptin. *Angew. Chemie - Int. Ed.* **55**, 1662–1665 (2016).
- 636 18. Salo, O. V. *et al.* Genomic mutational analysis of the impact of the classical strain improvement  
637 program on  $\beta$ -lactam producing *Penicillium chrysogenum*. *BMC Genomics* **16**, 937 (2015).
- 638 19. van den Berg, M. A. Impact of the *Penicillium chrysogenum* genome on industrial production of  
639 metabolites. *Appl. Microbiol. Biotechnol.* **92**, 45–53 (2011).
- 640 20. Harris, D. M. *et al.* Engineering of *Penicillium chrysogenum* for fermentative production of a novel  
641 carbamoylated cephem antibiotic precursor. *Metab. Eng.* **11**, 125–37 (2009).
- 642 21. McLean, K. J. *et al.* Single-step fermentative production of the cholesterol-lowering drug  
643 pravastatin via reprogramming of *Penicillium chrysogenum*. *Proc. Natl. Acad. Sci.* **112**, 2847–2852  
644 (2015).
- 645 22. van den Berg, M. a *et al.* Genome sequencing and analysis of the filamentous fungus *Penicillium*  
646 *chrysogenum*. *Nat. Biotechnol.* **26**, 1161–8 (2008).
- 647 23. Agren, R. *et al.* The RAVEN toolbox and its use for generating a genome-scale metabolic model for  
648 *Penicillium chrysogenum*. *PLoS Comput. Biol.* **9**, e1002980 (2013).
- 649 24. de Boer, P. *et al.* Highly efficient gene targeting in *Penicillium chrysogenum* using the bi-partite  
650 approach in *??lig4* or *??ku70* mutants. *Fungal Genet. Biol.* **47**, 839–846 (2010).
- 651 25. Pohl, C., Kiel, J. A. K. W., Driessen, A. J. M., Bovenberg, R. A. L. & Nygård, Y. CRISPR/Cas9 Based  
652 Genome Editing of *Penicillium chrysogenum*. *ACS Synth. Biol.* **5**, 754–764 (2016).
- 653 26. Cepeda-García, C. *et al.* Direct involvement of the CreA transcription factor in penicillin  
654 biosynthesis and expression of the *pcbAB* gene in *Penicillium chrysogenum*. *Appl. Microbiol.*  
655 *Biotechnol.* **98**, 7113–7124 (2014).
- 656 27. Viggiano, A. *et al.* Pathway for the biosynthesis of the pigment chrysogine by *Penicillium*  
657 *chrysogenum*. *Appl. Environ. Microbiol.* **84**, 1–11 (2018).
- 658 28. Nielsen, L. *et al.* Chrysogine Biosynthesis Is Mediated by a Two-Module Nonribosomal Peptide

- 659 Synthetase. 6–10 (2016). doi:10.1021/acs.jnatprod.6b00822
- 660 29. Ali, H. *et al.* A branched biosynthetic pathway is involved in production of roquefortine and  
661 related compounds in *Penicillium chrysogenum*. *PLoS One* **8**, e65328 (2013).
- 662 30. Ali, H. *et al.* A non-canonical NRPS is involved in the synthesis of fungisporin and related  
663 hydrophobic cyclic tetrapeptides in *Penicillium chrysogenum*. *PLoS One* **9**, (2014).
- 664 31. Salo, O. *et al.* Identification of a polyketide synthase involved in sorbicillin biosynthesis by  
665 *Penicillium chrysogenum*. *Appl. Environ. Microbiol.* **82**, 3971–3978 (2016).
- 666 32. Salo, O. V. *et al.* Genomic mutational analysis of the impact of the classical strain improvement  
667 program on  $\beta$ -lactam producing *Penicillium chrysogenum*. *BMC Genomics* **16**, 1–15 (2015).
- 668 33. Viggiano, A. *et al.* Pathway for the Biosynthesis of the Pigment Chrysogine by *Penicillium*  
669 *chrysogenum*. *Appl. Environ. Microbiol.* **84**, e02246-17 (2017).
- 670 34. Salo, O. V. *et al.* Genomic mutational analysis of the impact of the classical strain improvement  
671 program on  $\beta$ -lactam producing *Penicillium chrysogenum*. *BMC Genomics* **16**, 937 (2015).
- 672 35. Abdallah, Q. Al *et al.* Whole - genome sequencing reveals highly specific gene targeting by in vitro  
673 assembled Cas9 - ribonucleoprotein complexes in *Aspergillus fumigatus*. *Fungal Biol. Biotechnol.*  
674 5–12 (2018). doi:10.1186/s40694-018-0057-2
- 675 36. Nødvig, C. S., Nielsen, J. B., Kogle, M. E. & Mortensen, U. H. A CRISPR-Cas9 System for Genetic  
676 Engineering of Filamentous Fungi. *PLoS One* **10**, e0133085 (2015).
- 677 37. Kovalchuk, A., Weber, S., Nijland, J., Bovenberg, R. L. & Driessen, A. M. Fungal ABC Transporter  
678 Deletion and Localization Analysis. in *Plant Fungal Pathogens SE - 1* (eds. Bolton, M. D. &  
679 Thomma, B. P. H. J.) **835**, 1–16 (Humana Press, 2012).
- 680 38. Tautenhahn, R., Patti, G. J., Rinehart, D. & Siuzdak, G. XCMS Online: A Web-Based Platform to  
681 Process Untargeted Metabolomic Data. (2012).
- 682 39. Righelato, R. C., Trinci, a P. J., Pirt, S. J. & Peat, a. The Influence of Maintenance Energy and  
683 Growth Rate on the Metabolic Activity, Morphology and Conidiation of *Penicillium chrysogenum*.  
684 *J. Gen. Microbiol.* **50**, 399–412 (1968).

- 685 40. Jónás, Á. *et al.* Extra-and intracellular lactose catabolism in *Penicillium chrysogenum*:  
686 Phylogenetic and expression analysis of the putative permease and hydrolase genes. *J. Antibiot.*  
687 (*Tokyo*). **67**, 489–497 (2014).
- 688 41. Nagy, Z., Keresztessy, Z., Szentirmai, a & Biró, S. Carbon source regulation of beta-galactosidase  
689 biosynthesis in *Penicillium chrysogenum*. *J. Basic Microbiol.* **41**, 351–362 (2001).
- 690 42. Kanehisa, M. KEGG: Kyoto Encyclopedia of Genes and Genomes. *Nucleic Acids Res.* **28**, 27–30  
691 (2000).
- 692 43. Sutter, B. M., Wu, X., Laxman, S. & Tu, B. P. XMethionine inhibits autophagy and promotes growth  
693 by inducing the SAM-responsive methylation of PP2A. *Cell* **154**, 403–415 (2013).
- 694 44. Laxman, S. *et al.* XSulfur amino acids regulate translational capacity and metabolic homeostasis  
695 through modulation of tRNA thiolation. *Cell* **154**, (2013).
- 696 45. Feng, Y., He, D., Yao, Z. & Klionsky, D. J. The machinery of macroautophagy. *Cell Res.* **24**, 24–41  
697 (2014).
- 698 46. Ichimura, Y. *et al.* A ubiquitin-like sustem mediated protein lipidation. *Nature* **408**, 488–492  
699 (2000).
- 700 47. Kraft, C. *et al.* Binding of the Atg1/ULK1 kinase to the ubiquitin-like protein Atg8 regulates  
701 autophagy. *EMBO J.* **31**, 3691–3703 (2012).
- 702 48. Bartoszewska, M., Kiel, J. a K. W., Bovenberg, R. a L., Veenhuis, M. & van der Klei, I. J. Autophagy  
703 deficiency promotes beta-lactam production in *Penicillium chrysogenum*. *Appl. Environ.*  
704 *Microbiol.* **77**, 1413–22 (2011).
- 705 49. Kleijn, R. J. *et al.* Cytosolic NADPH metabolism in penicillin-G producing and non-producing  
706 chemostat cultures of *Penicillium chrysogenum*. *Metab. Eng.* **9**, 112–123 (2007).
- 707 50. Polli, F., Meijrink, B., Bovenberg, R. A. L. & Driessen, A. J. M. New promoters for strain engineering  
708 of *Penicillium chrysogenum*. *Fungal Genet. Biol.* **89**, 62–71 (2016).
- 709 51. Langfelder, K., Streibel, M., Jahn, B., Haase, G. & Brakhage, A. A. Biosynthesis of fungal melanins  
710 and their importance for human pathogenic fungi. *Fungal Genet. Biol.* **38**, 143–158 (2003).

- 711 52. Guzmán-Chávez, F. *et al.* Deregulation of secondary metabolism in a histone deacetylase mutant  
712 of *Penicillium chrysogenum*. *Microbiologyopen* e00598 (2018). doi:10.1002/mbo3.598
- 713 53. Hunkeler, M., Stuttfeld, E., Hagmann, A., Imseng, S. & Maier, T. The dynamic organization of  
714 fungal acetyl-CoA carboxylase. *Nat. Commun.* **7**, 11196 (2016).
- 715 54. Wakil, S. J., Stoops, J. K. & Joshi, V. C. Fatty acid synthesis and its regulation. *Annu. Rev. Biochem.*  
716 **52**, 537–79 (1983).
- 717 55. Grijseels, S. *et al.* Identification of the decumbenone biosynthetic gene cluster in *Penicillium*  
718 *decumbens* and the importance for production of calbistrin. *Fungal Biol. Biotechnol.* **5**, 18 (2018).
- 719 56. Fujii, Y., Asahara, M., Ichinoe, M. & Nakajima, H. Fungal melanin inhibitor and related compounds  
720 from *Penicillium decumbens*. *Phytochemistry* **60**, 703–708 (2002).
- 721 57. Herbst, D. A., Townsend, C. A. & Maier, T. The architectures of iterative type I PKS and FAS. *Nat.*  
722 *Prod. Rep.* **35**, 1046–1069 (2018).
- 723 58. Livak, K. J. & Schmittgen, T. D. Analysis of Relative Gene Expression Data Using Real-Time  
724 Quantitative PCR and the 2- $\Delta\Delta$ CT Method. *Methods* **25**, 402–408 (2001).
- 725 59. Ye, J. *et al.* Primer-BLAST: a tool to design target-specific primers for polymerase chain reaction.  
726 *BMC Bioinformatics* **13**, 134 (2012).
- 727 60. Polli, F., Meijrink, B., Bovenberg, R. A. L. & Driessen, A. J. M. New promoters for strain engineering  
728 of *Penicillium chrysogenum*. *Fungal Genet. Biol.* **89**, 62–71 (2016).
- 729 61. Weber, S. S., Kovalchuk, A., Bovenberg, R. a L. & Driessen, A. J. M. The ABC transporter ABC40  
730 encodes a phenylacetic acid export system in *Penicillium chrysogenum*. *Fungal Genet. Biol.* **49**,  
731 915–21 (2012).
- 732 62. Grijseels, S. *et al.* Physiological characterization of secondary metabolite producing *Penicillium*  
733 cell factories. *Fungal Biol. Biotechnol.* **4**, 8 (2017).
- 734 63. Douma, R. D. *et al.* Intracellular metabolite determination in the presence of extracellular  
735 abundance: Application to the penicillin biosynthesis pathway in *Penicillium chrysogenum*.  
736 *Biotechnol. Bioeng.* **107**, 105–115 (2010).

- 737 64. Iversen, J. J. L., Thomsen, J. K. & Cox, R. P. On-line growth measurements in bioreactors by  
738 titrating metabolic proton exchange. *Appl. Microbiol. Biotechnol.* **42**, 256–262 (1994).
- 739 65. de Jonge, L. P., Douma, R. D., Heijnen, J. J. & van Gulik, W. M. Optimization of cold methanol  
740 quenching for quantitative metabolomics of *Penicillium chrysogenum*. *Metabolomics* **8**, 727–735  
741 (2012).
- 742 66. Forsberg, E. M. *et al.* Data processing, multi-omic pathway mapping, and metabolite activity  
743 analysis using XCMS Online. *Nat. Protoc.* **13**, 633–651 (2018).
- 744 67. Harris, D. M. *et al.* Enzymic analysis of NADPH metabolism in  $\beta$ -lactam-producing *Penicillium*  
745 *chrysogenum*: Presence of a mitochondrial NADPH dehydrogenase. *Metab. Eng.* **8**, 91–101 (2006).
- 746 68. Garcia-Alcalde, F., Garcia-Lopez, F., Dopazo, J. & Conesa, A. Paintomics: a web based tool for the  
747 joint visualization of transcriptomics and metabolomics data. *Bioinformatics* **27**, 137–139 (2011).
- 748 69. Priebe, S., Kreisel, C., Horn, F. & Guthke, R. Databases and ontologies FungiFun2 : a  
749 comprehensive online resource for systematic analysis of gene lists from fungal species. **31**, 445–  
750 446 (2015).
- 751 70. Ruepp, A. *et al.* The FunCat, a functional annotation scheme for systematic classification of  
752 proteins from whole genomes. *Nucleic Acids Res.* **32**, 5539–5545 (2004).
- 753 71. Bae, S., Park, J. & Kim, J. S. Cas-OFFinder: A fast and versatile algorithm that searches for potential  
754 off-target sites of Cas9 RNA-guided endonucleases. *Bioinformatics* **30**, 1473–1475 (2014).
- 755 72. Deatherage, D. E. & Barrick, J. E. *Engineering and Analyzing Multicellular Systems*. **1151**, (Springer  
756 New York, 2014).
- 757 73. Kumar, S., Stecher, G., Li, M., Knyaz, C. & Tamura, K. MEGA X: Molecular evolutionary genetics  
758 analysis across computing platforms. *Mol. Biol. Evol.* **35**, 1547–1549 (2018).

759

760

761 **Figures and Tables**

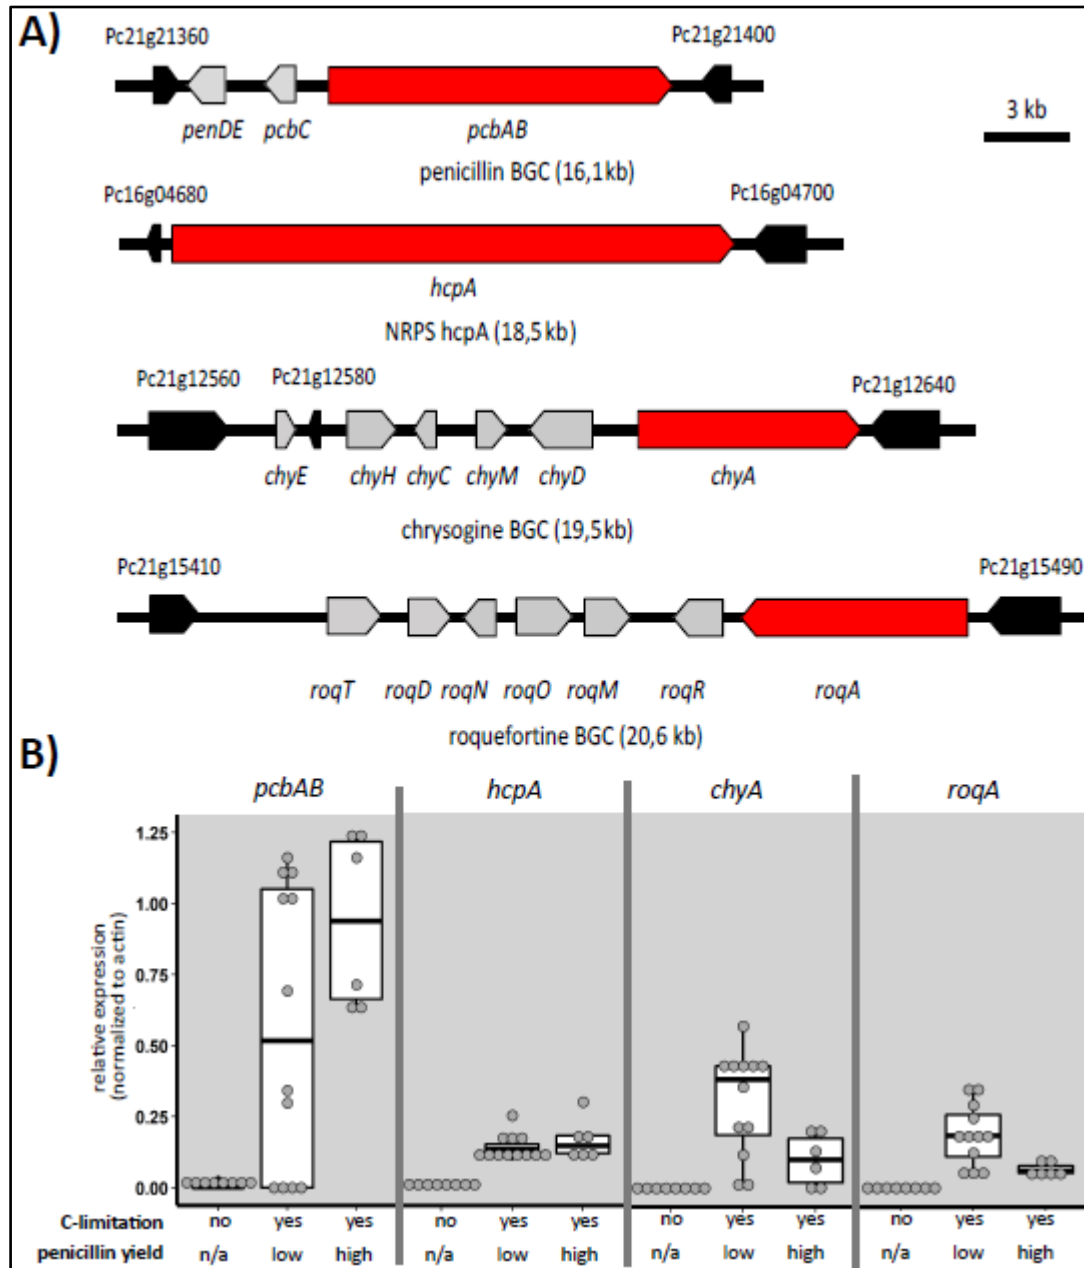

762  
763 **Figure 1:** Genomic structure of four BGCs displaying strong expression and relative expression of the core  
764 core gene under three different conditions. A) Schematic organization of the BGCs identified as being strongly  
765 expressed. BGC core genes are shown in red, closest genes not part of the cluster are colored black. All  
766 loci are drawn to scale and arrow directions denote orientation of transcription. B) Relative expression of  
767 identified BGC core genes from 26 transcriptome analyses with strong expression. Experiments were

768 grouped according to carbon limitation and penicillin yield. n/a not applicable (because no quantities  
 769 reported).  
 770

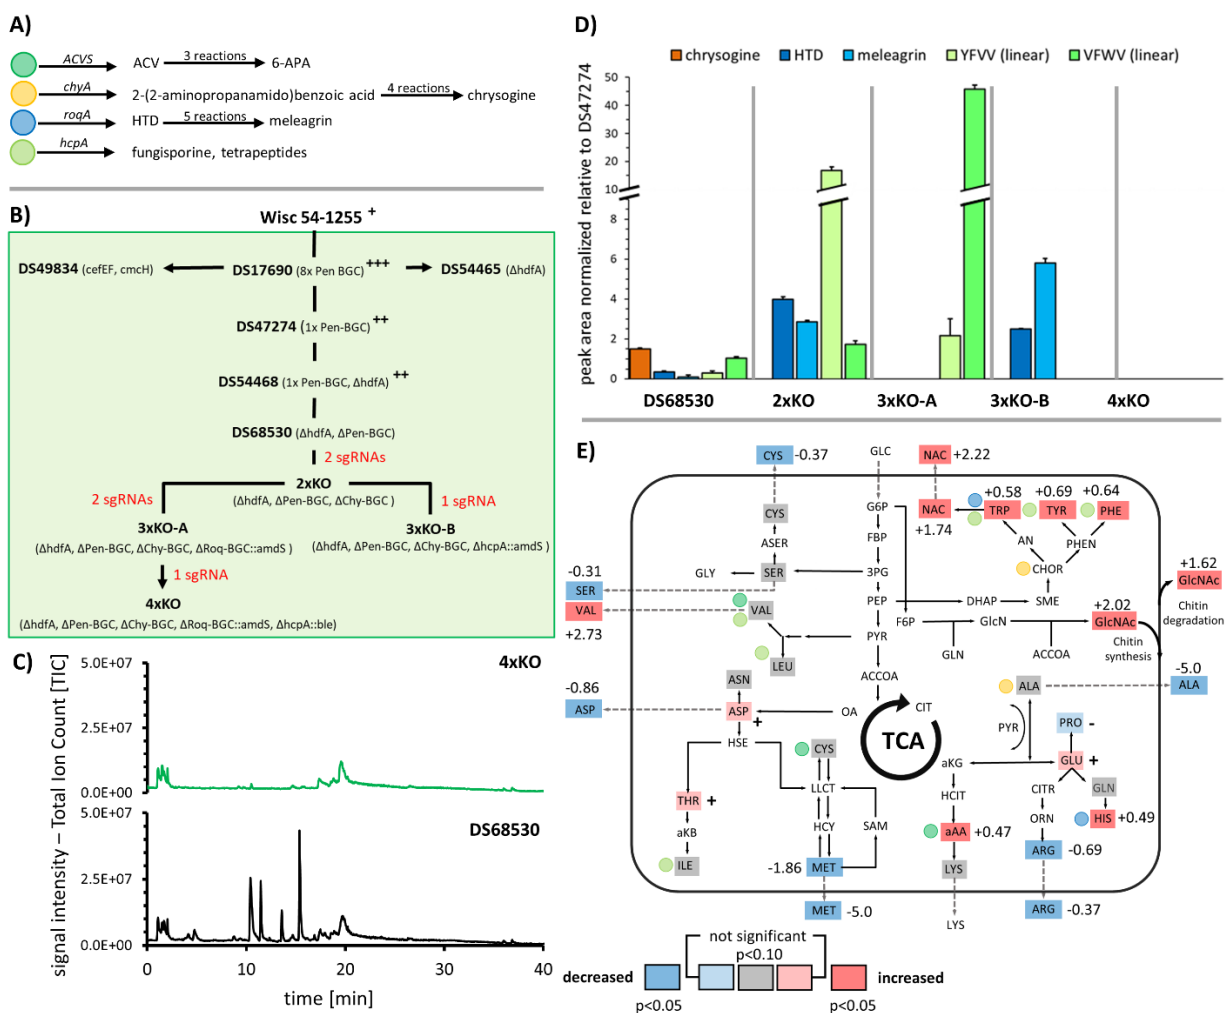

771  
 772  
 773 **Figure 2:** Effect of BGC deletion on secondary metabolites and amino acid levels. **A)** Overview of core BGC  
 774 genes, first products in pathways and number of reactions steps leading to the final products 6-aminopenicillanic acid (6-APA),  
 775 chrysoeine, meleagrins and fungisporins. **B)** Strain lineage of *P. rubens*, including strains utilized in this study. Penicillin yields are denoted by superscript (+)-symbols ranging from  
 776 (+) – low, (++) – intermediate to (+++) – high as far as reported. Figure adapted with modifications from<sup>32</sup>.  
 777 **C)** Total-ion-chromatograms of DS68530 and 4xKO, taken after five days of growth in SMP. **D)** Changes in  
 778



779 peak area of selected secondary metabolites associated with removed BGCs after five days of growth in  
 780 SMP medium (n=3). A time-course series of all secondary metabolites can be found in **supplementary**  
 781 **Information SI4**. E) Summary of changes in intra and extracellular amino acids and metabolites observed  
 782 in the 4xKO strain compared to the penicillin-producing strain DS54468 cultivated at a growth rate of 0.05  
 783 in a glucose-limited chemostat. A schematic view of amino acid metabolism is shown. Values next to amino  
 784 acids indicate log<sub>2</sub> fold changes if significant. Decreases are indicated by blue, increases by red and  
 785 unchanged amino acids by grey background. If the change is statistically not significant but p < 0.10, the  
 786 increase or decline in concentration is denoted by (+) or (-), respectively. Abbreviations: NAC = nicotinic  
 787 acid; HCIT = homocitrate; aAA = α-aminoadipic acid.

788

789

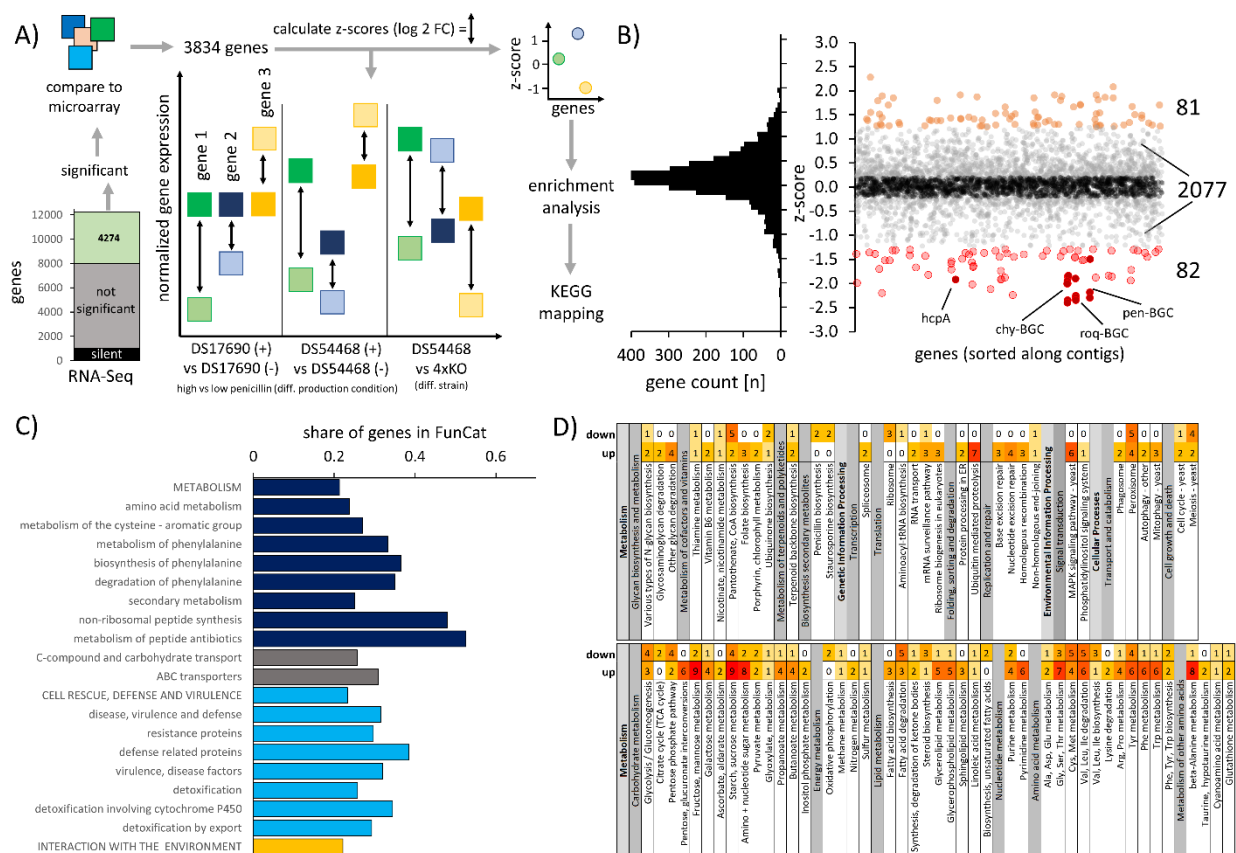

790

791 **Figure 3:** Analysis of transcriptome changes in 4xKO compared to DS54468 when growing in a glucose  
 792 limited chemostat at a dilution rate of 0.05 h<sup>-1</sup>. A) Scheme for identification of genes that are differently  
 793 expressed due to the absence of four BGCs. If the log<sub>2</sub> FC of a gene in 4xKO and DS54468 is more different

794 than observed log<sub>2</sub> FCs from microarray experiments of strains grown in absence or presence of penicillin  
 795 sidechain precursor, the z-score will become negative or positive, depending on the direction of the  
 796 change. B) Distribution of z-scores for sufficiently covered genes and visualization of z-score over contigs,  
 797 sorted from 1 to 49. Orange and red dots represent genes with a significantly different z-score (rate of  
 798 false positives < 0.05, based on random sampling of normally distributed numbers). A clustering effect of  
 799 negative z-score is seen for hcpA, chy-, roq- and pen-BGC which are highlighted. C) Enriched FunCat  
 800 categories (p < 0.05, FDR corrected) derived from 2440 genes where |z| > 0.2. D) Overview of KEGG-  
 801 pathways of *P. rubens* Wisconsin 54-1255 with up- and downregulated expression identified in this study.

802

803

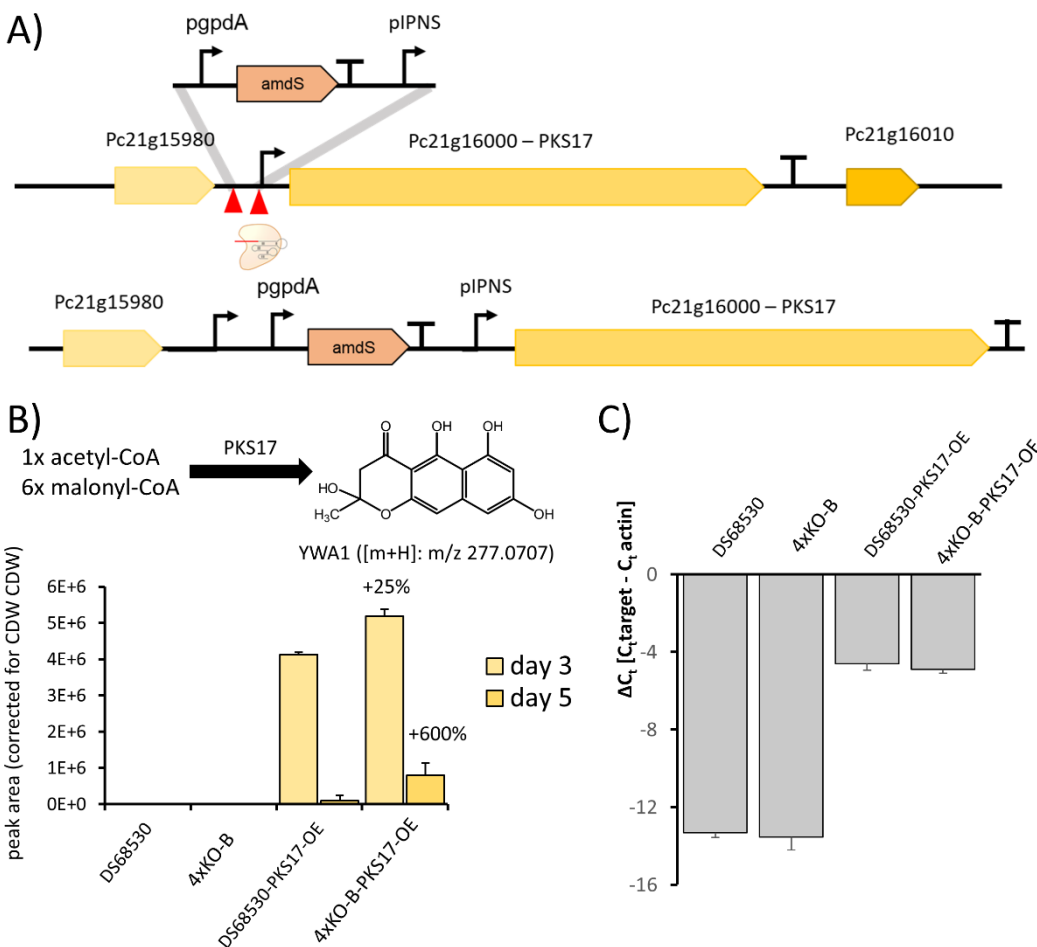

804

805 **Figure 4** – Overexpression of PKS17 in DS68530 and 4xKO-B. a) Schema showing the strategy used for  
 806 integrating the IPNS promoter in front of Pc21g16000. b) The initial molecule produced by PKS17 is the

807 naphthopyrone YWA1, which was quantified by LC-MS in fermentation broth of the indicated strains after  
 808 3 and 5 days. c) Expression of Pc21g16000 quantified by means of qPCR on day 3 of growth in SMP. The  
 809 gene is not expressed in DS68530 and 4xKO-B and expression when replacing the promoter is unchanged  
 810 between DS68530-*PKS17*-OE and 4KO-B-*PKS17*-OE, as seen by the difference in the similar  $\Delta$ ct.

811

812

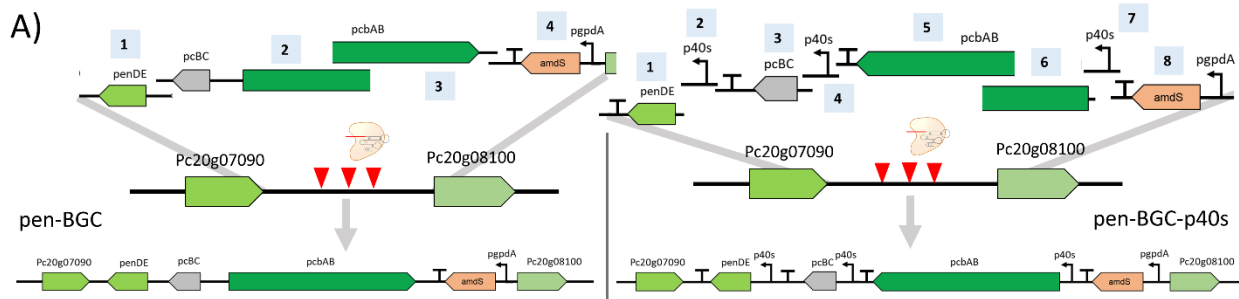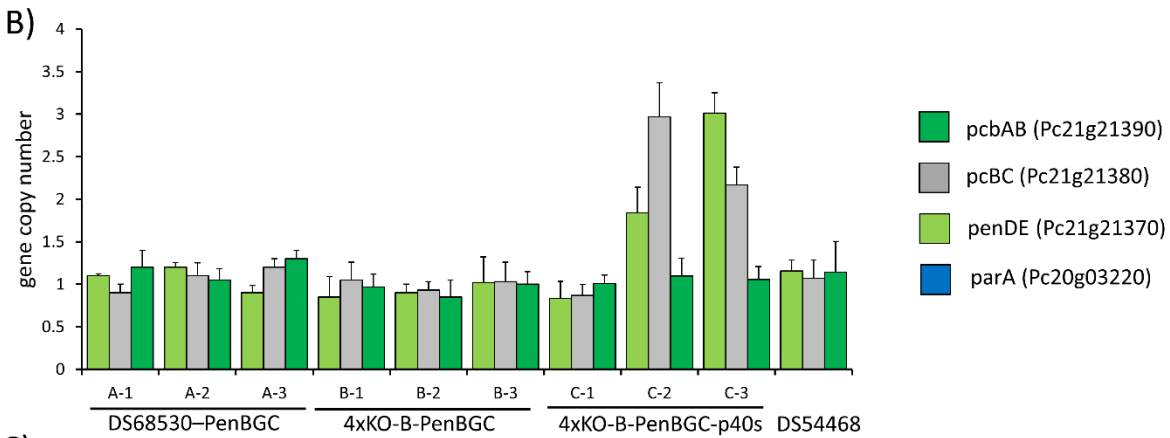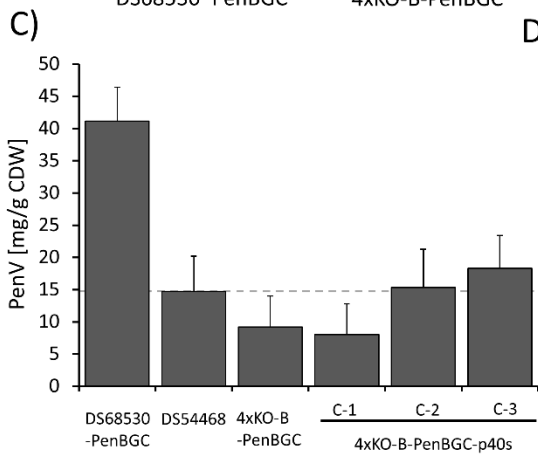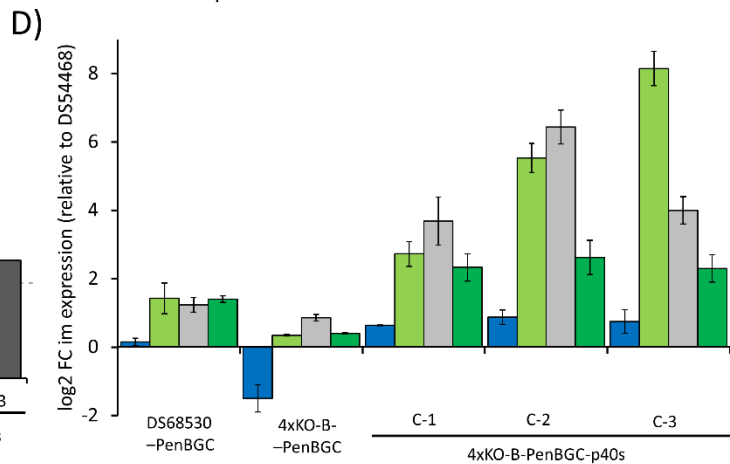

813

814 **Figure 5:** Integration of the Penicillin cluster into DS68530 and 4xKO-B. A) Scheme for  
 815 recombination of parts obtained by PCR into the intergenic region of Pc20g07090 and  
 816 Pc20g08100 using either the native promoters or p40s for expressing all genes of the pen-BGC.  
 817 B) Copy number of integrated pen-BGC genes in the obtained strains. C) Penicillin V concentration  
 818 after five days of growth in SMP + POA medium D) Changes in gene expression for pcbAB, pcBC,  
 819 penDE and parA relative to the single-copy pen-BGC strain DS54468.

820

821

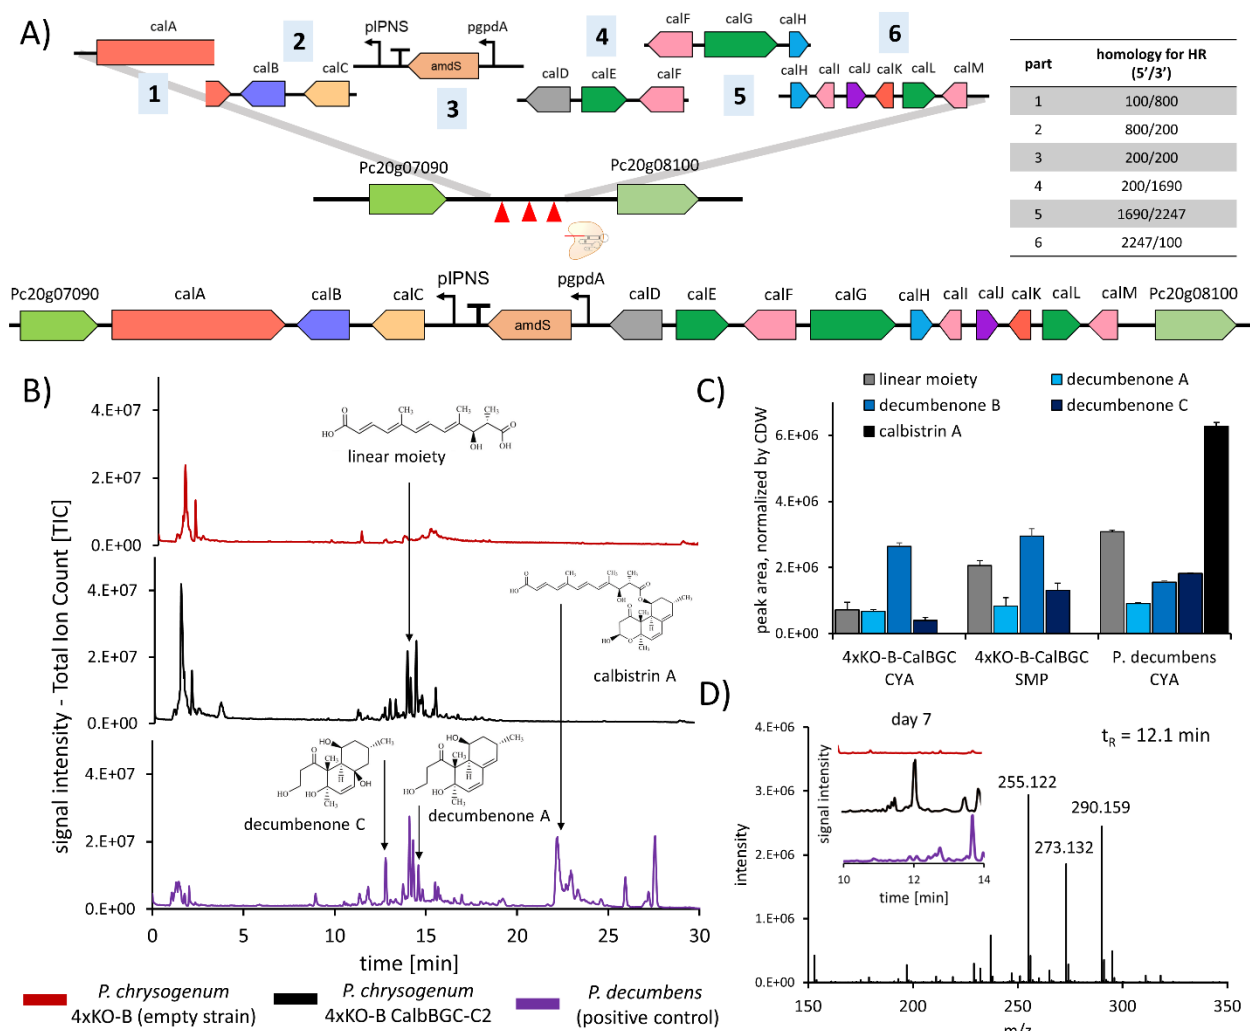

822

823 **Figure 6:** Integration of the calbistrin cluster from *P. decubens* into 4xKO-B and verification of  
 824 production. A) Scheme for recombination of six parts obtained by PCR into the intergenic region

825 of Pc20g07090 and Pc20g08100. Obtained clones were verified by colony PCR (**Supplementary**  
 826 **information 19**). B) Total-ion-chromatograms of samples taken five days after inoculation of CYA  
 827 medium. Shown are 4xKO-B, a representative clone (4xKO-B-CalBGC-C2) and *P. decumbens*,  
 828 serving as a positive control. Arrows indicate the retention times of the depicted molecules. C)  
 829 Peak areas of calbistrin-related metabolites quantified in SMP medium and CYA medium taken  
 830 five days after inoculation. Peak areas are depicted as mean of biological triplicates for 4xKO-B-  
 831 CalBGC and biological duplicates for *P. decumbens*. No calbistrin A and C were detected in  
 832 supernatant of 4xKO-B-CalBGC. An overview of retention times used m/z for quantification and  
 833 obtained culture dry weight can be found in (**Supplementary Information 20 and 22**). D)  
 834 Appearance of previously not observed peak in 4xKO-B CalBGC after 7 days of cultivation in CYA  
 835 medium at a retention time of 12.1 min. Most abundant m/z in this peak were m/z 255.122,  
 836 273.132 and 290.159.

837

838 **Table 1:** Strains created in this study and transformations performed.

| Strain        | genotype                                                                                         | parental strain | donor DNA strategy                             | clones total | µg marker cassette used | tested / positive clones (colony PCR) |
|---------------|--------------------------------------------------------------------------------------------------|-----------------|------------------------------------------------|--------------|-------------------------|---------------------------------------|
| 2xKO          | ( $\Delta$ hdfA, $\Delta$ Pen-BGC, $\Delta$ Chy-BGC)                                             | DS68530         | 1 part, 1500 bp homology, marker free          | 67           | 10                      | 24/2                                  |
| 3xKO-A        | ( $\Delta$ hdfA, $\Delta$ Pen-BGC, $\Delta$ Chy-BGC, $\Delta$ Roq-BGC::amdS)                     | 2xKO            | 1 part, 100 bp homology, acetamide selection   | 106          | 5                       | 6/6                                   |
| 3xKO-B        | ( $\Delta$ hdfA, $\Delta$ Pen-BGC, $\Delta$ Chy-BGC, $\Delta$ hcpA::amdS)                        | 2xKO            | 1 part, 100 bp homology, acetamide selection   | 213          | 5                       | 6/6                                   |
| 4xKO          | ( $\Delta$ hdfA, $\Delta$ Pen-BGC, $\Delta$ Chy-BGC, $\Delta$ Roq-BGC::amdS, $\Delta$ hcpA::ble) | 3xKO-A          | 1 part, 100 bp homology, phleomycin selection  | 79           | 5                       | 6/4                                   |
| <b>4xKO-B</b> | ( $\Delta$ hdfA, $\Delta$ Pen-BGC, $\Delta$ Chy-BGC, $\Delta$ Roq-BGC::ergA, $\Delta$ hcpA::ble) | 4xKO            | 1 part, 100 bp homology, terbinafine selection | 238          | 5                       | 6/5                                   |

|                           |                                          |         |                                                        |     |   |       |
|---------------------------|------------------------------------------|---------|--------------------------------------------------------|-----|---|-------|
| <b>4xKO-B-PenBGC</b>      | pen-BGC in IGR                           | 4xKO-B  | 1 part, >1000bp<br>homology, acetamide selection       | 11  | 3 | 6/6   |
| <b>DS68530-PenBGC</b>     | pen-BGC in IGR                           | DS68530 | 4 parts, >1000 bp<br>homology, acetamide selection     | 41  | 3 | 6/6   |
| <b>4xKO-B-PenBGC-p40s</b> | pen-BGC in IGR, p40s for all genes       | 4xKO-B  | 8 parts, 100 bp<br>homology, acetamide selection       | 26  | 2 | 17/4  |
| <b>DS68530-PKS17-OE</b>   | Integrating pIPNS in front of Pc21g16000 | DS68530 | 1 part, 100 bp<br>homology, acetamide selection        | 146 | 4 | 6/6   |
| <b>4xKO-B-PKS17-OE</b>    | Integrating pIPNS in front of Pc21g16000 | 4xKO-B  | 100 bp homology, acetamide selection                   | 183 | 4 | 6/6   |
| <b>4xKO-B-Cal-BGC</b>     | Integrating cal-BGC in IGR               | 4xKO-B  | 6 parts, 100 to >1000 bp homology, acetamide selection | 97  | 3 | 16/16 |

839

840
